# Supplementary material for: Multifaceted intervention for the prevention and management of musculoskeletal pain in nursing staff: Results of a cluster randomized controlled trial
Source: PLoS One. 2019 Nov 18;14(11):e0225198. doi: 10.1371/journal.pone.0225198 (PMC6860418; doi:10.1371/journal.pone.0225198)
Supplement: S4 File — Musculoskeletal Pain and Work Role Functioning Questionnaire INTEVAL_Spain database. (XLS) [file pone.0225198.s004.xls]

## Sheet: Sheet1
ID	questionnaire	hospital_unit	grupo_ic	sex	age	shift	contract	occupation	neck_pain_3c	lowback_pain_3c	elbows_pain_3c	hands_pain_3c	legs_pain_3c	knees_pain_3c	feet_pain_3c	WRFQ_a	WRFQ_b	WRFQ_c	WRFQ_d	WRFQ_e	WRFQ_f	WRFQ_g	WRFQ_h	WRFQ_i	WRFQ_j	WRFQ_k	WRFQ_l	WRFQ_m	WRFQ_n	WRFQ_nn	WRFQ_o	WRFQ_p	WRFQ_q	WRFQ_r	WRFQ_s	WRFQ_t	WRFQ_u	WRFQ_v	WRFQ_w	WRFQ_x	WRFQ_y	WRFQ_z	age_3c	neck_pain_2c	lowback_pain_2c	elbows_pain_2c	hands_pain_2c	legs_pain_2c	knees_pain_2c
1	0	6	0	1	36	3	2	0	2	2	0	0	2	0	2	4	4	4	4	4	3	3	5	3	4	4	3	3	4	3	3	4		4	4	4	4	4	4	4	4	4	2	1	1	0	0	1	0
2	0				36	1	2	0	1	1																					.												2	1	1
3	0	4	1	1	42	1	2	1	2	0	0	0	0	0	2	4	4	4	4	4	4	4	4	4	4	4	4	4	4	4	4	4	4	4	4	4	4	4	4	4	4	4	2	1	0	0	0	0	0
4	0	4	1	1	31	1	3	0	0	1	0	0	2	0	0	4	3	4	3	4	4	4	3	4	4	4	4	4	4	4	4	4	4	4	4	4	4	4	4	4	4	4	2	0	1	0	0	1	0
5	0	4	1	1	44	1	2	1	1	2					2	4	3	4	3	4	4	4	3	4	4	4	4	4	4	4	4	4	4	4	4	4	4	4	4	4	4	4	2	1	1
6	0	4	1	1	38	1	3	1	1	2	0	0	0	0	0	4	4	4	4	4	4	4	4	4	4	4	4	4	4	3	4	3	4	4	4	4	4	4	4	4	3	4	2	1	1	0	0	0	0
7	0	4	1	1	60	1	1	0	2	2	0	0	0	0	0	4	4	4	4	4	4	4	4	4	5	4	4	4	4	4	4	4	4	4	4	4	4	4	4	4	4	4	3	1	1	0	0	0	0
8	0	4	1	1	55	1	2	1	1	2	0	2	2	2	0	4	4	4	4	4	4	4	4	4	4	4	4	4	3	2	3	3	4	4	4	4	4	3	3	4	4	4	3	1	1	0	1	1	1
9	0	2	1	0	31	3	4	0	2	0	0	0	0	0	2	4	4	4	3	2	3	2	2	2	2	2	3	4	4	2	2	3	4	4	3	4	3	3	3	5	3	4	2	1	0	0	0	0	0
10	0	4	1	1	39	2	2	0	2	2	0	0	0	0	0	4	2	3	3	3	3	3	3	3	3	3	3	4	3	3	3	3	4	4	4	4	4	4	4	4	3	4	2	1	1	0	0	0	0
11	0	4	1	1	35	2	3	0	1	1	0	2	2	2	0		4	4	3	4	3	4	4	3		4	4	5	2	1	3	3	4	4	4	4	4	3	4	5	4	4	2	1	1	0	1	1	1
12	0	3	0	1	47	2	2	1	1	2	2	1	2	1	1	4	3	3	3	4	4	4	4	4	4	3	4	4	1	3	3	3	3	4	4	4	4	4	4	4	3	3	2	1	1	1	1	1	1
13	0	4	1	1	37	3	2	1	1	1	0	2	2	0	2	4	2	4	4	4	2	3	2	4	5	3	4	4	2	2	1	2	2	3	4	4	3	3	3	5	3	4	2	1	1	0	1	1	0
14	0	2	1	1	52	3	2	0	0	1	0	0	2	0	0																.												3	0	1	0	0	1	0
15	0	3	0	0	57	3	2	0	0	0	0	0	0	2	0	3	4	4	3	4	3	3	3	3	3	4	4	4	4	4	4	5	5	4	3	4	3	3	3	4	3	4	3	0	0	0	0	0	1
16	0	4	1	1	38	3	2	0	1	1	0	2	2	0	2	4	4	4	4	4	2	3	3	4	4	3	4	4	2	3	3	3	3	4	4	4	4	4	4	4	4	4	2	1	1	0	1	1	0
17	0	4	1	1	54	3	2	0	1	1	0	2	2	1	2	3	4	4	3	2	3	3	3	2	3	4	5	1	3	3	2	3		4	4	4	3	4	4	4	4	4	3	1	1	0	1	1	1
18	0	3	0	1	49	3	3	0	0	2	0	0	0	0	0	4	4	4	4	4	3	3	3	3	4	3	4	5	5	3	3	3	5	3	3	4	3	3	3	4	3	4	2	0	1	0	0	0	0
19	0	4	1	1	35	3	3	0	2	2	0	2	0	0	0	4	3	3	3	4	2	3	2	2	4	3	3	3	1	1	1	1	2	3	3	3	3	3	3	3	3	2	2	1	1	0	1	0	0
20	0	4	1	1	49	3	2	1	1	0	0	2	0	0	2	4	3	4	3	4	3	3	3	5	4	3	4	5	4	4	4	4	4	4	4	4	4	4	4	3	4	4	2	1	0	0	1	0	0
21	0	4	1	1	37	1	2	0	2	0	0	2	2	0	0	3	4	3	3	3	3	2	2	3	4	3	4	4	3	3	3	3	3	4	4	4	4	3	3	4	4	4	2	1	0	0	1	1	0
22	0	4	1	1	33	1	2	1	1	1	2	0	2	2	0	4	3	4	3	3	2	2	3	3	4	4	4	3	1	1	1	1	2	4	4	4	4	4	3	5	3	4	2	1	1	1	0	1	1
23	0	4	1	1	50	1	2	0	1	2	0	2	2	2	2	4	4	4	4	4			4				4	4	1	1	4	4	4	4	4	4	4	4	4	4		4	3	1	1	0	1	1	1
24	0	5	1	1	42	3	2	1	2	0	0	0	0	2	0	4	1	1	3	4	3	3	1	4	4	1	4	5	4	4	3	3	4	4	4	4	4	4	4	4	3	4	2	1	0	0	0	0	1
25	0	5	1	1	47	3	2	1	2			2				4	2	4	3	4	3	3	1	4	4	4	4	4	4	3	3	1	4	4	4	4	4	4	4	4	3	4	2	1			1
26	0	5	1	1	63	3	2	1	0	0	0	0	0	0	0	5	4	4	4	4	4	4	4	4	4	4	4	4	4	5	5	4	4	4	4	4	4	4	4	4	4	4	3	0	0	0	0	0	0
27	0	2	1	1	54	3	2	0	1	1	0	1	2	0	0	4	4	4	3	4	3	3	3	3	5	3	3	5	3	3	5	3	4	4	4	4	4	3	4	5	3	4	3	1	1	0	1	1	0
28	0	2	1	0	42	3	3	0	1	1	2	1	1	2	1	1	2	2	2	2	1	1	2	2	3	1	1	3	2	2	2	2	3	2	2	3	3	3	3	3	3	3	2	1	1	1	1	1	1
29	0	2	1	1	54	3	2	0	1	2	0	2	1	0	2	4	4	4	3	4	3	3	3	3	5	3	3	4	3	3	5	3	4	4	4	4	4	3	4	5	3	4	3	1	1	0	1	1	0
30	0	2	1	1	58		2	1	2	2	0	0	2	0	2	4	4	4	4	4	4	4	4	4	1	4	4	4	4	4	4	4	4	4	4	4	4	4	4	4	2	4	3	1	1	0	0	1	0
31	0	2	1	1	52	3	2	1	1	2	0	0	0	0	0	4	4	4	3	4	3	3	3	4	3	3	2	3	2	3	2	3	3	3	3	3	3	3	2	2	3	3	3	1	1	0	0	0	0
32	0	6	0		28	1	2	1	2	1	0	0	2	0	2	4	4	3	4	4	3	2	3	4	4	4	4	4	2	2	2	2	4	3	3	2	2	2	3	3	2	4	1	1	1	0	0	1	0
33	0	1	0	1	47	3	2	0	2	1	0	0	2	2	0	3	3	3	3	4	3	3	3	3	3	3	3	3	2	2	3	3	3	3	3	4	3	2	3	3	2	2	2	1	1	0	0	1	1
34	0	1	0	1	42	3	2	0	2	2	0	0	2	0	0	4	4	4	4	4	4	4	4	4	4	4	4	4	4	4	4	4	4	4	4	4	4	4	4	4	4	4	2	1	1	0	0	1	0
35	0	1	0	1	38	3	2	0	0	0	0	0	2	0	0	3	4	4	4	4	4	4	4	4	4	4	4	5	3	3	4	4	4	4	4	4	4	4	4	4	4	4	2	0	0	0	0	1	0
36	0	1	0	1	36	3	4	0	0	0	0	0	0	0	0	4	4	4	3	4	3	3	3	3	5	3	3	5	3	3	3	3	4	4	4	4	3	3	3	4	3	3	2	0	0	0	0	0	0
37	0	1	0	1	28	3	4	0	2	2	0	0	0	0	0	4	4	4	3	3	3	3	3	3	3	3	4	5	2	3	4	4		3	4	4	3	3	4	3	3	4	1	1	1	0	0	0	0
38	0	1	0	1	30	3	3	1	1	1	0	2	2	2	2	4	4	4	1	4	1	3	2	3	5	1	3	4	3	3	3	3	4	2	2	3	2	3	2	4	2	3	1	1	1	0	1	1	1
39	0	1	0	1	31	3	3	0	2	1	0	2	0	0	2	3	4	4	4	4	4	4	4	4	5	4	4	4	3	3	4	4	4	4	4	4	4	4	3	4	4	4	2	1	1	0	1	0	0
40	0	1	0	1	34	3	3	0	1	1	1	0	2	1	2	4	4	4	4	4	4	4	4	4	4	4	4	4	3	4	3	3	4	4	4	4	4	3	4	4	4	4	2	1	1	1	0	1	1
41	0	2	1	1	57	3	2	1	1	1		2	2		1	3	4	4	3	4	4	4	3	4	5	4	4	5	3	3	3	4	4	4	4	4	3	3	3	4	4	4	3	1	1		1	1
42	0	3	0	1	44	3	2	1	1	2	0	2	0	0	0	4	4	4	4	4	1	1	2	4	4	3	3	4	1	4	4	1	4	4	4	3	4	4	3	3	4	4	2	1	1	0	1	0	0
43	0	4	1	1	44	3	2	0	1	1	0	2	0	2	0	1	4	4	3	2	3	3	3	4	4	4	4	3	3	3	3	2	4	3	4	4	4	4	3	4	3	3	2	1	1	0	1	0	1
44	0	4	1		43	3	2	1	1	1	0	0	2	0	0	3	4	4	4	4	2	3	3	4	4	4	4	3	3	3	3	3	4	4	4	4	4	3	3	4	4	4	2	1	1	0	0	1	0
45	0	4	1	1	51	3	2	0	1	0	0	0	0	0	0	3	4	4	3	4	3	4	4	4	4	4	4	4	3	4	3	4	3	4	4	4	4	4	4	4	4	4	3	1	0	0	0	0	0
46	0	5	1	1	26	2	4	1	2	0	1	0	2	2	1	1	4	4	5	5	4	4	3	1	1	4	4	2	2	2	2	2	3	1	0	0	0	0	2	0	0	4	1	1	0	1	0	1	1
47	0	5	1	0	34	2	3	0	2	2	0	0	0	0	2	4	4	4	3	4	3	3	4	4	2	3	4	4	3	3	3	4	4	4	2	4	2	3	4	3	4	4	2	1	1	0	0	0	0
48	0			1	50	2	2	1	1	1	2	1	2	2	1	1	5	5	4	3	3	3	3	3	3	3		3	2	2	2	2	2	2	4	3	3	3	3	4	4	4	3	1	1	1	1	1	1
49	0	5	1	0	54	1	2	1	2	1	0	2	1	0	2	4	4	4	4	4	3	2	2	3	3	3	4	5	3	4	3	3	3	2	2	3	2	4	4	4	4	4	3	1	1	0	1	1	0
50	0	5	1	0	50	1	1	0	2	1	0	0	0	0	0	3	3	3	0	4	1	0	0	1	1	0	1	1	1	5	3	3	3	3	3	1	1	0	0	0	0	0	3	1	1	0	0	0	0
51	0	5	1	1	44	1	1	1	1	2	0	0	0	2	0	4	4	4	1	4	3	2	3	3	3	2	3	3	3	4	4	3	3	3	1	4	3	3	4	4	4	4	2	1	1	0	0	0	1
52	0	5	1	1	41	1	2	1	2	2	0	0	0	0	0	4	4	4	3	1	3	4	3	4	3	3	2	4	4	4	4	4	4	3	4	3	4	4	4	3	3	4	2	1	1	0	0	0	0
53	0	5	1	1	55	1	1	1	2	1				2		3	4	4	2	4	3	3	3	3	4	4	4	4	3	5	5	4	3	3	4	4	3	3	4	4	3	4	3	1	1				1
54	0	5	1	1	61	4	3	1	2	0	0		0	0	0	4	4	4	4	4	3	4	4	4	4	4	4	4	3	5	4	4	4	4	4	4	4	4	4	4	4	4	3	1	0	0		0	0
55	0	3	0	1		2		0								4	4	4	4	4	4	4	4	4	4	4	4	4	4	4	4	4	4	4	4	4	4	4	4	4	4	4	3
56	0	3	0	1	52	2	2	0	0	2	0	0	2	1	0	4	4	4	4	4	3	3	3	4	0	4	4	0	4	3	4	4	4	4	4	4	4	4	4	4	4	4	3	0	1	0	0	1	1
57	0	3	0	1	43	2	3	1	0	2	0	0	2	2	2	5	4	4	3	3	4	3	3	3	4	4	4	3	5	5	3	5	5	4	3	4	4	5	3	3	4	4	2	0	1	0	0	1	1
58	0	3	0	1	37		2	0	0	2	0	0	0	0	0	4	4	4	3	4	4	4	3	3	4	4	4	4	4	3	3	4	4	4	4	4	4	4	4	3	4	4	2	0	1	0	0	0	0
59	0	3	0	0	56	1	2	0	2	2	0	2	2	0	0	4	4	4	3	4	3	3	3	4	4	3	4	5	3	4	4	3	4	4	4	3	4	4	3	4	3	4	3	1	1	0	1	1	0
60	0			1	61	2	3	1	2	0	0	1	0	0	0	4	4	4	4	4	5	4	4	4	4	4	3	3	4	4	5	4	5	4	4	4	3	3	3	3	4	4	3	1	0	0	1	0	0
61	0	5	1	0	46	2	4	1	0	2	0	0	0	0	0	4	4	5	5	4	3	3	3	2	3	3	4	3	4	5	4	4	4	4	3	3		4	5	3	3	4	2	0	1	0	0	0	0
62	0	5	1		51	2	3	1	0	0	0	0	0	0	0	4	4	3	4	4	3	3	3	3	3	3	4	3	3	3	3	3	3	4	4	4	4	3	3	4	3	4	3	0	0	0	0	0	0
63	0	3	0	1	39	1	2	1	2	2	0	0	2	0	2	3	3	3	2	4	3	3	3	3	1	2	3	3	1	1	1	2	3	3	3	3	3	3	4	4	4	4	2	1	1	0	0	1	0
64	0	5	1	0	23	2	4	1	0	2	0	0	0	0	0	4	4	4	3	3	4	3	2	2	2	3	4	3	4	3	3	3	3	4	3	3	3	4	4	4	3	4	1	0	1	0	0	0	0
65	0	3	0	1	35	1	2	1	2	2	0	0	2	2	2	3	4	4	4	4	3	2	2	3	1	3	2	3	2	1	2	2	3	3	3	3	3	3	3	2	3	4	2	1	1	0	0	1	1
66	0	2	1	1	61	1	1	0	1	1	2	0	2	0	2	4	4	4	4	4	4	4	4	4	4	3	4	4	4	4	4	4	4	4	4	4	4	4	4	4	4	4	3	1	1	1	0	1	0
67	0	2	1	1	52	1	2	0	2	2	0	2	0	0	2	3	3	3	2	2	3	3	3	3	3	3	2	1	3	3	3	2	3	3	3	3	3	2	2	3	2	2	3	1	1	0	1	0	0
68	0	2	1	1	51	1	2	0	1	2	0	0	0	2	0	3	4	4	4	4	4	4	4	4	4	4	4	4	4	4	4	4	4	4	4	4	4	4	4	4	3	4	3	1	1	0	0	0	1
69	0	2	1	1	60	1	2	0	2	1	2	1	2	1	2	3	3	4	3	3	3	3	3	3	4	3	4	4	2	3	3	3	3	3	3	4	3	3	3	4	3	3	3	1	1	1	1	1	1
70	0	2	1	1	53	1	2	0	1	1	0	1	0	0	0	1	3	3	2	2	2	0	1	1	0	0	1	2	2	2	2	2	2	1	1	3	3	3	2	1	3	4	3	1	1	0	1	0	0
71	0	2	1	1	43	1	2	1	1	0	0	2	0	0	0	3	4	4	1	4	3	3	4	4	4	4	4	4	2	3	3	3	3	4	4	4	4	3	4	3	3	4	2	1	0	0	1	0	0
72	0	5	1	1	28	2	3	0	0	2	0	0	0	0	0	4	4	4	4	4	4	4	4	4	5	4	4	4	4	3	3	3	4	4	4	4	4	4	4	4	4	4	1	0	1	0	0	0	0
73	0	5	1	1	23	2	4	1	0	2	0	0	0	2	2	4	4	4	4	4	3	3	3	4	4	3	4	4	5	5	3	3	4	4	4	4	4	4	4	4	4	4	1	0	1	0	0	0	1
74	0	2	1	1	58	1	2	1	1	2	0	2	2	1	1	2	2	2	3	2	3	3	2	3	4	4	4	3	3	3	3	3	3	2	3	4	3	3	3	3	4	4	3	1	1	0	1	1	1
75	0	2	1	1	49	1	2	1	1	2	1	0	1	2	0	3	3	3	3	3	5	3	3	3	3	3	3	3	0	3	2	2	3	3	3	3	3	2	2	2	4	4	2	1	1	1	0	1	1
76	0	2	1	1	54	1	2	0	1	2	0	1	2	0	0	4	3	4	3	4	3	3	3	3	3	2	3	5		4	4	4	4	4	4	4	4	3	4	3	3	3	3	1	1	0	1	1	0
77	0	2	1	1	41	1	2	0	2	0	0	0	2	2	0	4	4	4	3	4	3	4	3	4	4	3	4	4	3	3	3	3	3	4	4	3	3	3	4	4	4	4	2	1	0	0	0	1	1
78	0	5	1		53	3	1	1	1	2	0	2	2	0	1	3	4	4	4	4	3	3	4	4	4	4	5	3	3	3	3	3	3	4	4	3	4	4	2	4	4	4	3	1	1	0	1	1	0
79	0	5	1	1	53	3	3	1	1	2	2	2	2	1	0	4	4	4	4	4	3	3	4	4	4	4	3	3	3	2	2	2	4	4	4	4	4	3	4	4	4	4	3	1	1	1	1	1	1
80	0	6	0	1	33	2	2	0	2	0	0	0	0	0	0	4	4	4	3	4	3	3	3	3	3	3	4	4	3	4	3	3	4	4	4	3	3	3	4	3	3	3	2	1	0	0	0	0	0
81	0	6	0	1	34	2	3	0	1	1	0	0	2	0	0	3	3	3		4	3	3	3	3	3	3	3	4	4	4	4	3	4	3	3	3	3	3	4	4	4	3	2	1	1	0	0	1	0
82	0	6	0	1	38	1	2	0	1	1	0	0	2	0	2	4	3	2	2	3	3	3	3	3	4	3	4	3	3	5	2	5	4	4	4	4	4	3	4	3	3	4	2	1	1	0	0	1	0
83	0	6	0	0	49	2	2	1	1	1						3		4	3	4	3	4	4	4		3	4	4	5	4	3	4	4	4	4	4	4	4	4	4	4	4	2	1	1
84	0	6	0	1		1	2	0	1	1	0	0	2	1	1	4	4	4	4	3	3	1	1		2	3	3	3	2	4	1	2	0	4	4	4	4	3	3	1	4	4	3	1	1	0	0	1	1
85	0	6	0		39	1	2	0	0	2	0	0	0	0	0	4	4	4	3	4	3	3	3	3	3	1	2	2	3	4	4	4	4	4	4	4	4	3	1	2	4	4	2	0	1	0	0	0	0
86	0	6	0	1	44	1	2	0	1	2	0	0	0	0	0	4	4	4	4	4	3	3	3	3	4	3	3	5	3	3	3	4	3	3	3	3	3	3	4	4	3	4	2	1	1	0	0	0	0
87	0	6	0		58	1	2	0	0	0	0	1	0	1	1	4	4	4	4	4	4	3	4	3	4	4	4	4	3	4	3	4	3	4	4	4	4	4	4	4	4	4	3	0	0	0	1	0	1
88	0	6	0	1		1	2	1	2	2	0	0	0	0	0	4	4	4	4	4	4	4	4					4	4	4	4	4	4						4	4	4	4	3	1	1	0	0	0	0
89	0	6	0	1	46	3	2	0	2	2	0	2	2	0	2	4	4	4	4	4	4	4	4	4	4	4	4	4	2	2	2	2	3	4	4	4	4	4	2	4	4	4	2	1	1	0	1	1	0
90	0	6	0		38	1	4	1	2	2	2	0	0	0	1	4	4	4	3	4	4	3	3	4		4		4	3	3	4	3	4	4	4	4	4	4	4	4	4	4	2	1	1	1	0	0	0
91	0	6	0	1	52	3	2	1	2	2	2	0	0	0	0	4	4	4	4	4	4	4	4	4	4	4	4	4	2	2	2	2	3	4	4	4	4	4	2	4	4	4	3	1	1	1	0	0	0
92	0	6	0	1	53	2	2	1	1	1	0	1	2	2	1	1	1	1	1	1	1	1	1	3	3	2	2	3	3	3	3	1	1	1	2	3	3	3	4	4	3	1	3	1	1	0	1	1	1
93	0	6	0	1	53	2	2	1								3	3	3	3	3	3	3	3	3	3	3	3	3	3	3	3	3	3	3	3	3	3	3	3	3	3	3	3
94	0	5	1	0	47	3	2	1	0	0	0	0	0	0	0	4	4	3	4	4	3	4	3	4	3	4	3	4	4	4	4	4	4	4	4	4	4	4	4	4	4	4	2	0	0	0	0	0	0
95	0	5	1	1	34	3	3	0	1	1	0	0	2	0	0	3	3	4	4	4	3	3	3	4	5	4	4	4	3	5	4	4	5	4	4	4	4	4	4	4	4	4	2	1	1	0	0	1	0
96	0	1	0	1	25	2	4	0	1	1	0	0	0	0	0																.												1	1	1	0	0	0	0
97	0	1	0	1	33	2	3	0	1	1	0	0	0	2	0	3	4	4	3	4	4	4	3	4	4	4	3	4	4	2	2	2	3	3	4	4	4	3	4	4	3	3	2	1	1	0	0	0	1
98	0															5	4	4	3	4	3	3	3	4	4	3	3	5	3	3	3	3	3	4	4	4	4	4	4	4	3	4	3
99	0	1	0	0	37	2	3	0	0	0	0	0	0	0	0	4	4	4	4	4	4	4	4	4	4	4	4	4	4	4	4	4	4	4	4	4	4	4	4	5	4	4	2	0	0	0	0	0	0
100	0	1	0	1	39	2	2	0	2	1	0	0	2	0	0	4	4	4	4	4	3	3	4	1	4	4	4	5	3	4	3	3	4	4	4	4	4	4	4	5	2	4	2	1	1	0	0	1	0
101	0	1	0	1	40	2	4	0	1	2	0	1	2	0	0																.												2	1	1	0	1	1	0
102	0	1	0	1	22	2	4	0	1	2	0	0	0	0	0	4	4	3	3	4	3	3	3	3	4	4	4	3	0	4	3	3	3	3	4	4	3	3	4	3	3	4	1	1	1	0	0	0	0
103	0	1	0	1	23	2	5	1	2	1	0	0	0	0	0																.												1	1	1	0	0	0	0
104	0	3	0	1	35	1	2	0	2	0	0	0	0	0	0	3	4	4	3	4	3	2	1	3	3	2	2	4	5	5	3	3	4	2	2	3	3	2	4	3	4	3	2	1	0	0	0	0	0
105	0	1	0	1	47	2	2	0	0	0	0	0	0	0	0	3	3	4	3	4	3	3	3	3	3	3	4	4	3	3	3	4	4	4	4	4	4	4	3	4	4	4	2	0	0	0	0	0	0
106	0	1	0	1	24	2	4	0	2	1	0	0	0	0	0	3	4	4	2	2	2	2	2	3	3	3	4	1	3	2	3	3	3	4	4	3	4	3	4	4	3	3	1	1	1	0	0	0	0
107	0	2	1	1	27	1	4	0	2	1	0	0	2	1	2	3	4	4	4	4	3	3	4	3	4	4	4	4	4	3	3	4	4	4	4	4	4	4	3	3	4	4	1	1	1	0	0	1	1
108	0	2	1	0	50	4	4	0	1	0	0	0	0	0	0	4	4	4	4	4	4	4	4	4	5	4	4	3	3	3	3	3	4	4	4	4	4	4	4	4	3	4	3	1	0	0	0	0	0
109	0	2	1	1	32	2	2	0	2	1	0	0	2	0	1	4	4	3	3	4	2	2	3	4	3	4	4	5	3	2	4	4	5	4	4	4	3	4	4	4	3	3	2	1	1	0	0	1	0
110	0	2	1	1	24	2	4	0	1	0	0	0	0	0	1	3	4	4	3	3	3	3	3	2	3	3	3	4	2	1	1	3	3	4	4	3	2	2	4	4	4	3	1	1	0	0	0	0	0
111	0	2	1	1	22	1	4	0	2	1	0	0	0	0	0	4	4	4	4	4	3	3	4	3	3	3	3	4	3	3	4	3	4	3	3	4	4	3	4	4	4	4	1	1	1	0	0	0	0
112	0	1	0	0	28	4	4	1		2			2																		.												1		1			1
113	0	1	0	1	23	2	4	0																							.												1
114	0	2	1	1	38	4	4	1	2	2	0	0	0	0	0	4	4	4	4	3	3	3	3	4	3	4	3	0	0		1	1	1	4	4	4	4	4	4	4	4	4	2	1	1	0	0	0	0
115	0	1	0	1	32	1	2	0	0	2	0	0	0	0	0	4	4	4	3	4	3	3	3	4	3	3	4	4	4	4	4	4	4	4	4	4	4	4	4	4	4	4	2	0	1	0	0	0	0
116	0	1	0	1	54	1	2	0	2	1	0	2		1	1	3	3	3	3	3	3	3	3	4	4	4	4	4	3	3	3	3	4	4	4	4	4	4	3	4	4	4	3	1	1	0	1		1
117	0	1	0	1	44	1	2	0	2	0	0	0	2	0	0	4	3	3	3	3	4	4	4	4	4	4	4	4	4	4	4	4	4	4	4	4	4	4	4	4	3	4	2	1	0	0	0	1	0
118	0	1	0	1	59	1	2	0	0	0	0	0	0	0	0	4	4	4	3	4	4	4	4	4	5	4	4	4	4	4	4	4	4	4	4	4	4	4	4	4	4	4	3	0	0	0	0	0	0
119	0	1	0	1	36	2	3	0	2	0	0	0	0	0	0	4	4	4	4	4	4	4	4	4	4	4	4	4	4	4	4	4	4	4	4	4	4	3	4	4	4	4	2	1	0	0	0	0	0
120	0	1	0	1	55	2	2	0	0	1	0	0	0	0	0	4	3	3	3	4	3	3	4	4	5	4	4	4	5	3	3	3	4	4	3	4	4	3	4	4	3	4	3	0	1	0	0	0	0
121	0	1	0	1	35	2	3	0	1	2	0	0	2	0	2	4	4	4	3	3	4	3	4	4	4	4	4	4	5	4	4	4	5	4	4	4	4	4	4	4	3	4	2	1	1	0	0	1	0
122	0	2	1	1	60	1	1	0	0	2	0	2	0	0	0	3	4	4	3	4	4	3	3	3	4	4	4	4	4	4	4	4	4	4	4	4	4	3	4	3	4	4	3	0	1	0	1	0	0
123	0	2	1	1	29	1	4	0	2	2	0	0	0	0	0	4	4	4	3	2	4	3	4	3	5	3	3	4	3	3	3	3	3	4	4	4	4	3	4	4	3	3	1	1	1	0	0	0	0
124	0	2	1	1	51	2	2	1	2	2	0	0	2	0	0	4	4	4	3	3	4	4	3	4	4	4	4	4	2	3	3	3	3	4	4	4	4	4	4	3	3	4	3	1	1	0	0	1	0
125	0	2	1	1	51	2	2	0	1	1	0	0	1	0	0	3	1	2	4		4	4	3	4	3	3	4	4	3	3	3	3	4	4	4	4	4	4	4	4	3	4	3	1	1	0	0	1	0
126	0	2	1	1	25	2	4	0	2	2	0	0	2	2	0	4	3	3	2	4	3	3	3	3	1	2	2	3	2	2	2	2	2	2	2	2	2	2	2	2	2	2	1	1	1	0	0	1	1
127	0	6	0			1	4	0	0	2	0	0	0	0	0	4	4	4	5	4	4	4	4	5	5	4	4	4	5	4	4	4	4	4	4	4	4	4	5	4	3	4	3	0	1	0	0	0	0
128	0	6	0	1	59	3	2	0	0	2	0	0	0	2	0	4	4	4	5	4	4	3	4	4		3	4	3	3	3	3	3	4	3	4	4	4	4	3	4	4	4	3	0	1	0	0	0	1
129	0	6	0	1	54	3	2	0	2	2	1	0	0	1	0	3		4	4	4	3	3	4	4	4	3	4	3	3	3	4	4	4	4	4	4	4	3	4	4	4	4	3	1	1	1	0	0	1
130	0	6	0	1		3	2	1	1	2		1	2	2	1	2	2	3	2	3	2	2	2	4	3	3	3	2	1	2	2	2	1	3	4	4	4	4	3	5	3	4	3	1	1		1	1	1
131	0	6	0	1	51	3	2	1	2	1	2	2	1	2	1	2	3	4	2	4	3	3	3	3	3	3	3		2	2	2	2	3	4	4	3	4	4	3	4	4	4	3	1	1	1	1	1	1
132	0	6	0			1	3	0	2	2	0	0	2	0	2	4	3	3	2	2	2	2	2	4	1	1	2	3	3	3	2	2	2	3	2	2	1	2	4	3	3	3	3	1	1	0	0	1	0
133	0	3	0	1	44	1	2	0	2	2	0	0	0	2	0	4	4	4	4	3	3	3	2	3	3	3	3	4	5	3	4	4	4	3	3	3	3	3	4	4	3	4	2	1	1	0	0	0	1
134	0	8	0	0	51	1	2	0	1	1	2	0	0	0	1	2	3	4	3	2	3	2	2	3	3	2	3	4	4	2	3	3	2	4	3	3	3	3	3	4	4	4	3	1	1	1	0	0	0
135	0	2	1	1	49	2	2	0	1	0	0	1	1	0	2	4	4	4	4	4	4	4	4	4	4	4	4	5	5	4	3	4	5	4	4	4	4	4	4	4	4	4	2	1	0	0	1	1	0
136	0	1	0	1	59	1	1	0	2	2	0	0	2	1	0	3	4	4	3	3	3	3	3	3	4	4	4	3	3	3	3	3	4	4	4	4	4	4	3	3	3	4	3	1	1	0	0	1	1
137	0	1	0	0	45	1	2	1	1	0	0	2	0	2	2	4	1	4	1	0	2	3	2	3	3	3	3	4	3	2	3	3	3	4	3	3	3	2	4	3	4	4	2	1	0	0	1	0	1
138	0	1	0	1	50	1	2	0	1	2	0	0	2	0	0																.												3	1	1	0	0	1	0
139	0	3	0	1		1	2	1	1	2	0	0	0	0	0	4	4	4	3	4	3	4	4	4		4	4	4	3	3	3	3	3	4	4	4	4	3	4	3	4	4	3	1	1	0	0	0	0
140	0	3	0	0	35	2	4	0	0	0	0	0	0	0	0	4	4	4	4	4	4	4	3	4	4	3	4	4	4	4	4	4	4	4	4	4	4	4	4	4	4	4	2	0	0	0	0	0	0
141	0	3	0	1	26	1	4	0	0	2	0	0	0	0	0	4	4	4	4	4	4	4	5	4	4	4	4	4	5	4	4	4	4	4	4	4	4	4	4	4	4	4	1	0	1	0	0	0	0
142	0	3	0	1		2	5	0	1	2	0	1	1	2	1	3	3	4	5	4	4	4	5	4	5	4	4	3	3	3	3	3	4	4	4	4	4	4	3	4	3	4	3	1	1	0	1	1	1
143	0	6	0	1	39	1	4	0	1	0	0	0	0	0	0	4	4	4	4	4	4	4	4	4	4	4	4	5	5	3	5	4	5	4	3	4	4	4	4	4	4	4	2	1	0	0	0	0	0
144	0	6	0	1	37	2	3	0	2	1	0	0	0	0	0	4	4	4	3	4	3	3	3	3	3	1	3	4	3	3	3	3	3	3	3	4	3	3	4	3	3	3	2	1	1	0	0	0	0
145	0	1	0	1	40	1	2	0	2	2	2	2	0	0	0	4	4	4	4	4	4	3	3	4	3	4	4	4	3	3	3	4	3	4	4	4	4	4	3	3	3	4	2	1	1	1	1	0	0
146	0	1	0	0	43	1	2	0	2	2		2				3	3	3	3	4	3	4	3	3	3	3	3	4	3	4	4	3	4	3	3	4	3	3	3	4	4	4	2	1	1		1
147	0	8	0	1	52	1	2	0	2	2	2	0	0	2	0	3	4	4	5	3	2	3	3	4	3	4	4	4	3	3	3	3	4	4	4	4	4	4	4	4	3	3	3	1	1	1	0	0	1
148	0	8	0	1	43	3	2	0	2	2	0	0	0	0	2	4	4	4	4	4	4	4	4	4	4	4	4	5	4	4	4	4	4	4	3	4	3	3	3	4	4	4	2	1	1	0	0	0	0
149	0	8	0	1	30	2	2	0	2	2	0	2	0	0	0	3	2	3	4	4	3	3	3	4	4	3	4	4	3	3	3	3	3	3	3	4	3	3	3	3	4	4	1	1	1	0	1	0	0
150	0	8	0	1	49	1	2	1		1			2		1	3	3	4	5	4	3	4	4	4	4	4	4	4	3	3	4	3		4	4	4	4	4	4	4	3	4	2		1			1
151	0	8	0	1	43	1	2	0	2	2	0	2	0	1	2	4	3	3	3	4	3	3	3	4	4	3	3	3	3	3	3	3	3	3	3	4	4	4	4	3	4	4	2	1	1	0	1	0	1
152	0	5	1	1	50	2	3	1	2	2	0	2	1	2	1	3	3	3	3	3	3	3	3	3	3	3	3	3	3	1	1	1	2	3	3	3	3	3	3	3	3	3	3	1	1	0	1	1	1
153	0	5	1	1	55	2	3	1	1		0	0		2	0																.												3	1		0	0		1
154	0	5	1	1	46	2	4	1	1	1	0	0	0	0	0	5	4	4	5	4	4	3	4	4	1	4	4	5	5	4	4	4	4	3	4	4	4	4	4	4	4	4	2	1	1	0	0	0	0
155	0	2	1	1	42	2	2	0	2	2	2	2	2	2	2	3	3	3	2	3	3	2	3	3	4	4	3	3	3	2	3	3	4	3	3	4	3	2	3	3	4	4	2	1	1	1	1	1	1
156	0	3	0	1	28	1	4	0	0	2	0	1	2	0	0	5	4	4	4	3	4	4	3	4	4	4	3	4	2	2	2	2	3	4	4	4	4	4	4	4	3	4	1	0	1	0	1	1	0
157	0	3	0	1	50	1	2	0	2	0	0	0	0	0	0	4	4	4	4	4	4	4	4	3	2	4	4	4	4	4	4	4	4	4	3	4	4	4	4	3	2	4	3	1	0	0	0	0	0
158	0	5	1	1	28	3	4	1	2	2	0	0	0	0	0	4	4	4	4	4	3	4	4	3	4	4	4	4	4	4	4	4	4	4	4	4	4	4	4	4	4	4	1	1	1	0	0	0	0
159	0	5	1	1	47	1	2	1	2	2	0	2	2	2	0	3	4	3	3	4	4	3	3	3	3	3	3	4	3	3	3	3	3	3	3	4	4	4	4	4	4	4	2	1	1	0	1	1	1
160	0	5	1	1	23	2	4	1	2	2	0	2	0	0	0	4	4	4	3	4	4	4	4	4	4	4	4	4	3	3	3	3	4	4	4	4	4	3	4	4	3	4	1	1	1	0	1	0	0
161	0	3	0	1	43	2	2	0	0	0	0	0	0	0	0	4	4	4	4	4	4	4	4	4	5	4	4	4	5	4	4	4	4	4	4	4	4	4	4	4	3	4	2	0	0	0	0	0	0
162	0	3	0	1	40	4	5	1	1	1	0	0	0	0	0	4	3	3	3	3	3	3	3	3	3	3	3	3	3	3	3	3	3	3	3	3	3	3	3	3	3	3	2	1	1	0	0	0	0
163	0	4	1	1		1	4	1	2	0	0	0	0	0	2	4	4	3	1	2	3	3	3	3	4	3	4	4	4	4	3	3	4	4	4	3	4	3	4	4	4	3	3	1	0	0	0	0	0
164	0	4	1	1	40	1	2	0	2	0	0	2	2	0	1	3	3	4	3	3	2	2	2	3	4	3	3	2	5	1	2	2	3	4	3	3	2	3	3	3	4	3	2	1	0	0	1	1	0
165	0	4	1	1	38	1	2	1	2	2	0	0	0	0	0																.												2	1	1	0	0	0	0
166	0	5	1		28	1	3	1	1	2	0	0	0	0	0	3	3	4	4	3	3	3	3	4	4	4	4	4	3	4	3	3	5	3	3	4	3	3	4	3	4	4	1	1	1	0	0	0	0
167	0	2	1	1	33	1	2	1	2	2	0	2	2	2	0	2	4	4	2	3	3	2	2	4	4	3	4	4	2	2	2	2	4	4	4	4	4	4	4	4	4	4	2	1	1	0	1	1	1
168	0	2	1	1	46	1	2	0	2	2	0	2	2	2	0	3	4	4	2	3	3	3	2	4	4	3	4	4	2	2	2	2	4	4	4	4	4	4	4	4	4	4	2	1	1	0	1	1	1
169	0	2	1	1	33	1	3	0	2	2	0	0	2	0	0																.												2	1	1	0	0	1	0
170	0	2	1	1	53	3	2	0	2	2	0	1	1	2	0	3	4	4	4	4	3	4	3	4	3	4	4	4	3	3	2	3	4	3	4	4	4	3	3	3	2	4	3	1	1	0	1	1	1
171	0	2	1	1	54	3	2	0	2							3	4	4	4	4	4	4	4	4	4	4	4	4	3	4	4	3	4	4	4	4	4	4	4	4	4	4	3	1
172	0	2	1	1	53	3	2	0	1	1	0	2	2	2	2	4	4	4	3	4	3	3	3	3	3	4	4	4	3	4	4	3	4	4	4	4	4	4	4	4	4	4	3	1	1	0	1	1	1
173	0	2	1	1	34	2	2	0	1	2	0	0	2	0	2	3	2	2	1	3	1	1	3	3	2	3	3	4	2	3	2	2	2	3	3	3	3	2	2	3	3	3	2	1	1	0	0	1	0
174	0	2	1	1	37	2		0	1	0	2	0	1	1	0	3	1	3	3	4	3	3	3	4	3	3	3	3	5	3	4	3	4	3	3	3	3	4	4	4	3	4	2	1	0	1	0	1	1
175	0	1	0	1	42	3	4	0					2			4	4	4	3	3	3	3	3	3	2	3	3	3	3	4	3	3	3	4	3	3	3	3	3	3	3	4	2					1
176	0	2	1	1	34	3	4	0	1	1	0	0	2	0	0	3	4	4	1	4	0	3	3	3	3	2	2	3	1	1	2	2	4	3	3	3	2	2	1	1	4	1	2	1	1	0	0	1	0
177	0	1	0	1	35	3	3	0	2	2	0	0	2	2	0																.												2	1	1	0	0	1	1
178	0	3	0	1	30	1	4	0	1	2	0	0	0	0	0	4	4	4	4	4	4	4	4	4	4	4	4	5	5	3	3	3	5	4	4	4	4	4	4	4	4	3	1	1	1	0	0	0	0
179	0	1	0	1	47	3	2	0	2	0	0	0	2	0	2	3	2	4	4	3	3	3	3	4	5	2	2	4	5	3	3	3	3	2	2	3	2	3	3	4	3	3	2	1	0	0	0	1	0
180	0	3	0	0	36	3	4	0	0	0	0	0	0	0	0	3	4	4	3	2	2	1	2	0	2	3	3	4	5	2	1	3	5	4	4	4	4	4	4	4	4	4	2	0	0	0	0	0	0
181	0	2	1	1	25	3	4	0	2	2	0	0	0	0	0	4	4	4	4	4	3	3	3	4	3	3	4	4	3	3	3	4	4	4	4	4	4	4	3	4	4	4	1	1	1	0	0	0	0
182	0	2	1	1	54	3	2	0	2	1	2	2	2	1	2	3	3	4	4	4	4	4	4	4		4	4	3	3	4	4	4	4	4	4	4	4	4	4	4	4	4	3	1	1	1	1	1	1
183	0	4	1	1	30	1	3	0	2	1	0	2	0	0	2	1	4	4	4	4	4	4	3	4	4	3	3	3	2	2	3	2	2	3	4	4	4	3	4	4	3	4	1	1	1	0	1	0	0
184	0	5	1	0	32	1	2	0																							.												2
185	0	5	1	0	32	1	2	0	0	2	0	0	0	0	0																.												2	0	1	0	0	0	0
186	0	5	1	0	32	1		0	0	2	0	0	0	0	0	2	4	4	3	3	2	2		3	3	3	4	3	2		2	3	3	3	3	3	4		3	4	4	4	2	0	1	0	0	0	0
187	0	1	0	1	31	3	2	1	1	2	0	0	2	2	2	3	4	4	3	4	3	2	2	4	5	3	3	4	2	3	3	3	3	3	3	4	4	4	4	4	4	4	2	1	1	0	0	1	1
188	0	1	0	1	37	2	2	0	1	1	0	0	0	0	0	4	4	4	4	4	3	2	2	3	4	4	4	4	1	4	3	1	4	4	4	4	4	4	4	4	3	3	2	1	1	0	0	0	0
189	0	2	1	1	47	3		0	1	2	1	2	2	0	1	4	3	4	3	4	3	3	4	4	3	4	4	3	3	3	3	3	4	4	3	4	4	3	3	4	3	4	2	1	1	1	1	1	0
190	0	2	1	1	50	3	2	0	1	1	0	0	1	2	0	4	4	4	4	4	4	4	4	3	4	4	4	4	3	4	3	3	3	4	3	4	3	4	3	4	4	4	3	1	1	0	0	1	1
191	0	2	1	0	39	3	3	0	2	2	0	0	0	0	0	4	4	4	4	4	4	4	3	4	5	4	3	5	5	2	2	2	5	4	3	4	3	3	4	5	4	4	2	1	1	0	0	0	0
192	0	1	0	1	27	3	4	0	0	2	0	0	2	2	2	4	4	4	3	4	3	3	4	4	4	3	3	4	4	4	3	3	3	4	4	4	4	3	4	4	4	4	1	0	1	0	0	1	1
193	0	7	1	1	46	3	4	1	0	0	0	0	0	0	0	4	4	4	4	4	4	4	4	4	4	4	4	4	5	5	5	5	5	4	4	4	4	4	4	4	3	4	2	0	0	0	0	0	0
194	0	7	1	1	39		2	0	2	2	0	0	0	2	0	3	4	4	3	4	3	3	3	3	3	3	3	4	5	3	5	5	4	4	4	4	3	3	4	4	3	3	2	1	1	0	0	0	1
195	0	7	1	1	58	3	2	1	1	1						3	3	3	4	4	4	4	4	4	4	3	4	5	5	5	5	5	5	4	4	4	4	4	4	4	4	4	3	1	1
196	0	7	1	1	26	3	3	0	2	0	0	0	0	2	0	2	2	4	4	4	3	2	2	3	3	3	4	4	2	2	2	3	2	3	3	3	3	2	3	4	3	2	1	1	0	0	0	0	1
197	0	7	1	0	37	3	2	1	1	1						1	1	2	3	5	3	0	0	5	5	5	1	0	0	0	0	0	4	2	5	2	1	5	5	5	5	0	2	1	1
198	0	7	1	1	44	3	2	1	1	1	0	0	2	0	0	3	3	3	3	3	3	3	3	4	3	3	3	3	3	3	3	3	3	3	3	3	3	3	3	3	3	3	2	1	1	0	0	1	0
199	0	7	1	1	31	3	2	1	1	1	0	2	2	0	2	1	3	2	1	2	3	3	3	3	3	3	4	2	2	1	1	0	3	1	1	4	2	2	1	4	3	4	2	1	1	0	1	1	0
200	0	7	1	1	44	3	2	0	1	2	0	0	0	0	0	2	3	4	3	3	1	1	1	1	4	3	4	2	1		2	2	1	4	4	4	4	4	3	3	4	4	2	1	1	0	0	0	0
201	0	7	1	1	45	4	2	1	1	1	0	0	0	2	1	3	4	4	3	4	3	3	3	3	3	3	4	4		3	3	3	3	3	3	3	3	3	3	4	3	4	2	1	1	0	0	0	1
202	0	7	1	1	33	1	2	1	2	1	0	0	2	1	1	1	4	4	1	1	2	1	1	2	1	1	1	1	1	5	2	2	2	4	4	4	4	4	3	3	2	1	2	1	1	0	0	1	1
203	0	7	1	1	31		4	0	2	2	0	0	2	0	2	4	0	1	5	4	3	3	3	4	4	4	4	5	4	4	3	4	4	4	4	4	4	4	4	4	4	4	2	1	1	0	0	1	0
204	0	7	1	1	30	1	2	1	1	1	0	0	0	0	0	3	4	4	3	4	2	3	2	4	4	3	4	4	3	3	3	2	4	3	3	4	3	4	4	3	4	4	1	1	1	0	0	0	0
205	0	7	1	1	38	1	2	1	2			2	2	0	1	3	4	3	1	1	1	0	0	0							.							1	2	1	1	1	2	1			1	1	0
206	0	7	1	1	37	1	2	0	1	1	0	0	0	0	0	3	3	3	3	3	3	3	3	3	3	3	4	4	3	3	3	3	3	3	3	3	3	4	4	4	4	4	2	1	1	0	0	0	0
207	0	7	1	1	52	1	2	0	2	2	0	2	0	0	2	4	4	4	4	4	3	3	3	4	5	4	4	5	3	4	3	3	5	3	4	4	3	3	3	4	4	4	3	1	1	0	1	0	0
208	0	7	1	1	39	2	2	0	2	2	0	0	0	2	2	4	4	4	1	3	4	4	4	3	3	3	3	5	4	4	4	4	5	4	4	3	3	3	4	4	3	3	2	1	1	0	0	0	1
209	0	7	1	0		1	2	1	1	0	0	0	0	0	0	5	4	4	4	4	4	4	4	4	4	4	4	4	4	4	4	4	4	4	4	4	4	4	4	4	4	4	3	1	0	0	0	0	0
210	0	7	1	1	54	2	2	1	1	2	0	1	2	1	2	4	4	4	4	4	4	4	4	4	4	4	4	4	3	3	3	3	4	4	4	4	4	4	4	4	4	4	3	1	1	0	1	1	1
211	0	7	1	1	39	2	2	1	1	2	0	2	2	2	2	4	4	4	4	4	4	4	4	4	4	4	4	4	3	3	3	3	4	4	4	4	4	4	4	4	4	4	2	1	1	0	1	1	1
212	0	7	1	1	58	2	2	0	0	1	1	1	1	0	2	4	4	4	0	1	1	0	1	4	3	3	3	4	3	2	2	2	3	3	3	3	3	3	1	3	3	4	3	0	1	1	1	1	0
213	0	7	1	1	40	2	2	0	2	1	0	2	1	2	0	4	4	4	4	4	4	4	4	4	4	4	4	4	3	4	3	4	4	4	4	4	4	4	4	4	3	4	2	1	1	0	1	1	1
214	0	7	1	1	54	2	2	0	1	1	0	0	0	0	1	3	3	4	3		3	3	3	3	3	3	3	3	3	3	3	3	3	3	2	3	2	3	3	3	3	3	3	1	1	0	0	0	0
215	0	3	0	1		3		1	2	2	2	2	2	2	2	4	4	4	4	4	4	4	4	4	5	3	4	4	3	4	4	4	4	4	4	4	4	4	4	5	4	4	3	1	1	1	1	1	1
216	0	3	0	1		1	2	0	1	1	2	1	1	0	0	4	4	4	5	4	4	4	4	4		4	4	4	3	3	3	3	3	4	4	4	4	4	4	4	4		3	1	1	1	1	1	0
217	0	4	1	1		1	2	0	1	1	0	0	2	0	2	4	4	4	4	4	3	3	4	4	4	4	4	4	3	4	3	3	4	4	4	4	4	4	4	4	4	4	3	1	1	0	0	1	0
218	0	3	0	1	39	4	2	1	2	1	0	0	2	0	0	4	4	4	4	4	3	4	4	4	4	4	4	4	3	4	3	3	4	4	4	4	4	4	4	4	4	4	2	1	1	0	0	1	0
219	0	4	1	1	50	1	2	0	2				2			4	4	4	4	4	4	4	4	4	4	4	4	4	3	4	3	3	4	4	4	4	4	4	4	4	4	4	3	1				1
220	0	4	1	1		1	2	0	2	0	0	0	0	0	2	3	4	4	3	3	3	3	4	4	4	3	3	2	3	4	4	4	4	3	4	4	3	3	4	4	4	3	3	1	0	0	0	0	0
221	0	4	1	1	24	4	2	0	2	2	0	0	2	0	0	4	4	4	3	3	3	3	4	4	4	4	4	4	3	4	3	4	4	4	4	4	4	4	4	4	4	4	1	1	1	0	0	1	0
222	0	2	1						2	2	0	0	0	0	0	4	4	4	4	4	4	4	4	4	4	4	4	4	3	4	4	3	4	4	4	4	4	4	4	4	4	4	3	1	1	0	0	0	0
223	0	2	1	1	29	2	2	0	0	0	0	0	0	0	0	4	4	4	4	4	4	4	4	4	4	4	4	4	4	4	4	4	4	4	4	4	4	4	4	4	4	4	1	0	0	0	0	0	0
224	0	2	1	1	50	2	2	0	2	1	0	0	2	0	2	3	4	4	4	4	3	3	4	4	4	4	4	4	5	3	3	3	4	4	4	4	4	4	3	4	4	4	3	1	1	0	0	1	0
225	0	7	1	1	31	3	4	0	2	2	0	0	2	0	2	4	3	4	4	4	4	4	4	4	4	4	4	4	5	5	5	5	5	4	4	4	4	4	4	4	4	4	2	1	1	0	0	1	0
226	0	7	1	1	29	3	2	1	1	2	0	0	0	0	0	4	4	4	4	4	3	4	3	4	4	4	4	3	3	3	3	3	4	4	4	4	4	4	3	4	4	4	1	1	1	0	0	0	0
227	0	7	1	1	41	3	2	0	2	1	0	0	2	0	0	3	4	4	3	4	4	3	3	3	4	3	3	4	5	3	3	2	2	2	2	3	3	3	3	3	3	3	2	1	1	0	0	1	0
228	0	8	0	1	38	1	2	0	1	1	0	0	0	0	0	3	3	4	3	3	3	3	2	3	3	3	3	3	3	3	3	3	3	4	4	4	4	3	4	3	4	3	2	1	1	0	0	0	0
229	0	8	0	0	31	4	4	0	2	0	0	0	0	0	0	4	3	4	3	4	3	3	3	4	4	3	4	4	5	3	5	3	4	3	3	4	3	4	4	4	4	4	2	1	0	0	0	0	0
230	0	8	0	1	28	2	3	0	1	2	0	2	0	0	0	2	3	3	2	4	3	2	3	3	3	3	3	3	2	3	2	2	3	3	4	4	4	4	3	4	4	4	1	1	1	0	1	0	0
231	0	8	0	1	48	1	2	1	0	1	0	0		0	0	4	3	4	3	3	3	1	3	2	4	4	4	5	5	3	3	4	4	4	4	4	3	3	3	4	4	4	2	0	1	0	0		0
232	0	8	0	1		1	2	1	1	1	0	1	2	2	2	2	3	0	5	5	0	0	0	3	0	0	0	0	0	0	0	0	0	0	0	0	0	0	0	0	0	0	3	1	1	0	1	1	1
233	0	8	0	1	44	1	2	0	2	2	0	0	0	0	0	3	4	4	3	3	3	3	0	4	4	4	4	4	4	3	3	3	3	4	4	4	4	3	3	3	3	4	2	1	1	0	0	0	0
234	0	8	0	1	38	1	5	1	1	2	0	0	2	2	0	3	4	4	4	4	4	4	3	3	4	4	3	4	4	4	3	3	4	4	4	4	4	4	4	4	3	4	2	1	1	0	0	1	1
235	0	8	0	0	49	2	2	1	1	2	0	2	2	2	0	3	1	4	3	4	4	2	4	4	5	4	4	4	3	3	4	2	4	3	4	4	3	4	3	4	3	4	2	1	1	0	1	1	1
236	0	8	0	1	28	1	2	1	2	2	0	0	0	2	0	4	4	4	4	4	4	4	4	4	4	4	4	4	3	4	3	4	4	4	4	4	4	4	4	4	3	4	1	1	1	0	0	0	1
237	0	8	0	1	53	1	2	1	1	1	0	2	1	0	2	4	4	4	4	4	3	3	4	3	4	4	4	3	3	2	3	3	4	3	3	4	3	2	1	4	3	4	3	1	1	0	1	1	0
238	0	8	0	1	33	3	2	1	1	1	0	0	0	0	0	4	4	4	4	4	3	3	4	4	4	3	3	4	4	4	4	4	4	3	3	3	3	3	3	3	3	4	2	1	1	0	0	0	0
239	0	5	1	1	39	1	3	1	2	2	0	0	2	0	0																.												2	1	1	0	0	1	0
240	0	5	1	1	39	1	3	1	2	1	0	0	2	0	0	4	4	4	4	4	4	4	4	4	5	4	4	5	4	4	4	4	4	4	4	4	4	4	4	4	4	4	2	1	1	0	0	1	0
241	0	4	1	0	34	3	3	0	0	2	2	0	0	1	0	4	3	0	1	1	3	1	3	0	1	0	0	1	0	0	0	0	0	0	0	0	0	0	0	3	4	2	2	0	1	1	0	0	1
242	0	8	0	1	38	4	2	0	1	2	0	0	2	0	0	3	3	4	3	4	3	3	3	4	4	3	4	4	5	3	4	4	5	3	3	4	4	4	4	4	4	4	2	1	1	0	0	1	0
243	0	2	1	1	37	4	2	0	1	2	0	0	2	0	2	3	3	3	3	3	3	3	3	3	4	3	4	4	1	2	1	3	4	3	4	4	4	3	4	4	3	4	2	1	1	0	0	1	0
244	0	1	0	1	25	3	4	0	0	0	0	0	2	0	0	4	4	4	4	4	4	4	4	4	4	4	4	4	3	3	3	3	4	4	3	4	4	4	4	4	4	4	1	0	0	0	0	1	0
245	0	1	0	0	30	3	4	0	2	2	0	0	0	0	0	4	4	4	4	4	4	4	3	3	3	4	4	4	4	4	2	2	4	3	4	4	4	3	3	3	4	4	1	1	1	0	0	0	0
246	0	1	0	0	35	3	2	0	1	1	0	0	0	0	0	4	4	4	3	4	3	4	4	4	4	4	4	4	3	2	3	2	3	4	3	4	3	4	3	4	4	4	2	1	1	0	0	0	0
247	0	1	0	1	41	1	2	0	2	0	0	0	0	0	0	4	4	4	1	4	3	3	4	4	3	3	4	4	3	4	4	4	4	4	4	4	4	4	4	3	4	4	2	1	0	0	0	0	0
248	0	6	0	1	42	1	3	1	1	1	2	2	0	0	0	4	3	3	4	4	3	3	3	3	5	3	3	4	3	4	3	3	3	3	3	3	3	3	4	3	3	3	2	1	1	1	1	0	0
249	0	7	1	1	35	1	2	1	2	2		2				4	4	4	4	4	4	4	4	4	4	4	4	4	3		4	4	4	4	4	4	4	4	4	3	4	4	2	1	1		1
250	0	7	1	1	36	3	2	0	2	2	0	0	0	0	0	3	3	3	3	3	3	2	3	3	3	3	3	3	5	3	3	3	3	3	3	3	3	3	3	3	3	3	2	1	1	0	0	0	0
251	0	7	1	1	56	4	2	1	0	0	0	0	0	0	0	3	4	4	5	4	4	3	3	3	3	3	4	4	5	4	5	5	5	4	4	4	4	4	4	4	4	4	3	0	0	0	0	0	0
252	0	7	1	1	44	1	2	0	1	1						3	4	4	4	4	3	3	3	3	3	3	4	4	3	3	3	3	3	4	4	4	4	4	4	4	4	4	2	1	1
253	0	8	0	1	32	2	2	0	0	2	0	0	0	0	0	4	3	4	3	4	3	2	3	3	3	3	4	4	4	4	3	3	4	3	4	4	4	4	2	4	3	4	2	0	1	0	0	0	0
254	0	8	0	1	46	1	2	0	1	2	0	0	1	0	2	3	3	4	3	3	3	3	3	3	4	3	3	3	3	3	3	1	4	4	3	4	3	3	3	3	3	3	2	1	1	0	0	1	0
255	0	8	0	1	44	2	2	0	1	2	0	0	0	0	0	3	4	4	4	4	4	4	4	3	3	3	3	4	4	2	5	5	5	3	3	4	3	3	3	4	4	4	2	1	1	0	0	0	0
256	0	8	0	1	29	4	2	1	1	2	0	0	0	0	0	5	4	4	2	3	3	3	4	4	4	4	4	3	3	3	3	3	5	3	3	3	3	3	4	5	4	3	1	1	1	0	0	0	0
257	0	8	0	1	35	3	2	1	1	1	0	0	2	0	2	3	4	4	3	3	3	3	2	3	3	3	3	3	4	3	4	3	3	3	3	3	3	3	3	3	4	4	2	1	1	0	0	1	0
258	0	8	0	1	26	1	4	1	1	2	0	2	0	0	2	4	4	4	5	4	3	3	3	3	4	4	3	4	3	3	3	4	3	3	4	4	4	3	4	3	3	4	1	1	1	0	1	0	0
259	0	8	0	1	36	4	2	0	2	2	0	0	0	0	0	4	4	4	3	3	3	3	3	4	3	3	4	4	5	3	4	4	4	4	4	4	3	3	3	3	4	4	2	1	1	0	0	0	0
260	0	8	0	1	28	2	2	1	2	0	2	2	0	2	0	3	3	3	5	4	5	5	5	5	5	4	4	4	5	4	4	3	4	3	4	4	4	4	4	4	4	4	1	1	0	1	1	0	1
261	0	8	0	1	25	2	3	0	0	2	0	0	2	0	2	4	4	4	4	4	3	2	3	4	3	4	4	5	5	3	3	3	5	3	3	3	4	3	3	5	2	4	1	0	1	0	0	1	0
262	1	2	1	1	53	4	2	1	0	0	0	2	1	0	2	5	4	3	5	4	4	3	5	5	2	3	2	5	2	0	0	1	2	4	4	3	3	4	2	5	4	4	3	0	0	0	1	1	0
263	1	2	1	1	36	3	2	1	0	0	0	0	0	0	0	4	4	4	3	3	3	4	3	4	4	4	4	4	4	3	4	4	5	4	4	4	4	4	4	5	3	4	2	0	0	0	0	0	0
264	1	2	1	1	34	3	5	0	2	2	0	0	2	0	0	3	4	3	3	4	3	3	3	3	3	3	3	4	3	3	3	2	3	3	3	4	4	3	1	4	4	4	2	1	1	0	0	1	0
265	1	2	1	1	57	3	2	1	1	2		2	2			3	4	4	3	4	3	4	4	4	3	4	4	4	3	3	3	3	4	3	4	4	4	4	3	4	4	4	3	1	1		1	1
266	1	2	1	1	52	3	2	1	1	1	0	0	2	0	1	3	3	2	2	2	2	1	2	3	5	3	3	3	2	1	1	1	2	3	3	4	4	4	1	4	4	4	3	1	1	0	0	1	0
267	1	2	1	1	28	3		0	1	1	0	0	0	0	2	4	4	3	2	3	3	3	2	2	3	2	2	4	4	3	3	3	3	2	2	2	2	3	3	2	3	3	1	1	1	0	0	0	0
268	1	2	1	1	26	3	4	0	2	2	0	0	0	2	0	4	4	4	4	4	4	4	4	4	4	4	4	4	4	4	4	4	4	4	4	4	4	4	2	4	4	4	1	1	1	0	0	0	1
269	1	2	1	1	45	2	2	1	0	0	0	0	0	0	0																.												2	0	0	0	0	0	0
270	1	2	1	1	38	2	2	0	1	2	0	0	0	0	0	3	4	4	3	5	1	4	4	3	1	1	1	5	2	5	2	3	3	4	4	4	4	4	4	4	3	4	2	1	1	0	0	0	0
271	1	2	1	0	26	4	4	0	2	0	0	0	0	2	0	3	3	3	3	4	3	3	3	2	5	3	3	4	3	3	3	3	3	3	3	3	3	3	2	4	3	4	1	1	0	0	0	0	1
272	1	2	1	0	27	1	2	1	1	0	0	0	1	2	2	4	4	2	0	2	3	1	2	3	1	0	2	4	4	4	1	1	3	0	0	2	4	0	4	2	4	4	1	1	0	0	0	1	1
273	1	2	1	1	29	2	4	0	2	0	0	0	0	0	0	4	4	4	5	4	4	3	3	4	3	3	4	4	3	2	2	3	3	3	3	4	4	3	4	4	3	4	1	1	0	0	0	0	0
274	1	2	1	1	52	1	2	0	1	1	0	0	0	0	0	1	4	4	4	4	4	3	4	4	4	4	4	4	1	5	4	1	4	4	4	4	4	4	4	4	4	4	3	1	1	0	0	0	0
275	1	2	1	1	23	4	4	0	1	1	0	0	2	0	0	4	4	4	4	4	3	2	3	3	4	3	3	3	2	3	3	3	3	3	3	4	4	4	3	4	4	4	1	1	1	0	0	1	0
276	1	2	1	1	23	4	4	0	0	1	0	0	0	0	0	4	4	4	3	4	3	3	3	3	3	3	3	4	3	2	2	2	4	3	4	4	4	4	4	4	4	4	1	0	1	0	0	0	0
277	1	2	1	1	53	1		0	1	1	0	0	1	2	2	4	4	4		4	3	2	2	4	4	3	3	4	3	2	3	2	3	4	4	3	3	3	2	2	4	3	3	1	1	0	0	1	1
278	1	2	1	1	61	1	1	0	0	2	0	0	0	0	0	4	4	4	4	4	3	3	4	4	4	4	4	4	4	4	3	3	4	4	3	4	4	3	3	3	4	4	3	0	1	0	0	0	0
279	1	2	1	1	54	1	2	0	1	1	0	1	0	0	0	3	3	3	3	2	2	2	3	3	1	2	4	3	2	1	1	1	1	4	4	4	4	4	0	2	4	4	3	1	1	0	1	0	0
280	1	2	1	1	50	1	2	1	2	2	1	2	2	1	2	3	3	1	1	1	2	3	3	1	4	3	3	5	5	3	3	3	3	3	3	4	4	4	0	2	4	4	3	1	1	1	1	1	1
281	1	2	1	1	55	1	2	0	2	2	0	2	1	0	0	4	4	4	3	4	3	3	2	3	2	1	4	5	3	3	4	4	4	3	3	3	3	4	3	4	3	2	3	1	1	0	1	1	0
282	1	2	1	1	51	1	2	1				0	0			3	3	3	1	4	3	3	3	3	3	3	3	4	3	3	3	3	4	4	4	4	4	3	3	4	3	4	3				0	0
283	1	2	1	1	44	1	2	1	2	0	0	1	0	2	0	3	4	4	3	4	4	4	4	4	4	4	4	4	3	3	3	3	2	4	4	4	4	4	3	3	4	3	2	1	0	0	1	0	1
284	1	2	1	1	34	1	3	0	0	0	0	0	1	0	0	4	4	3	3	4	3	3	3	3	3	3	3	3	3	3	2	2	3	4	3	4	4	4	2	4	4	4	2	0	0	0	0	1	0
285	1	2	1	1	49	1	2	0	2	0	0	2		0	0	3	4	4	3	4	3	4	3	4	4	3	3	3	5	4	3	2	3	4	4	4	4	4	3	4	3	4	2	1	0	0	1		0
286	1	2	1	1	60	1	2	0	1	1	2	1	2	2	0	3	4	4	3	4	3	3	3	4	4	3	3	4	3	3	3	3	4	4	4	4	4	4	3	4	3	4	3	1	1	1	1	1	1
287	1			0																											.												3
288	1	2	1	0	41	1	2	0	2	0	0	0	0	0	0	4	4	4	4	4	4	4	3	3	3	4	4	4	4	3	3	4	4	3	4	4	4	4	4	4	4	4	2	1	0	0	0	0	0
289	1	2	1	1	58	1	2	0	1	2	1	2	2	0	1	4	4	4	4	4	4	4	4	4	4	4	4	4	4	4	3	3	3	4	4	4	4	3	3	4	4	4	3	1	1	1	1	1	0
290	1	2	1	1	38	3	2	1	1	2	0	0	0	0	0	2	0	3	2	2	1	1	1		2	2	3	3	2	3	2	1	2	2	2	1	2	2	4	4	3	4	2	1	1	0	0	0	0
291	1	2	1	1	53	3	2	1	1	2	0	2	2	2	0	4	3	3	3	4	3	4	4	4	4	4	4	4	3	4	4	3	3	4	4	4	4	4	3	3	4	4	3	1	1	0	1	1	1
292	1	2	1	1	50	3	2	0	1	1	0	2	1	0	1	3	1	1	2	2	2	3	3	3	3	3	2	2	2	2	5	1	2	3	3	3	3	3	1	5	3	3	3	1	1	0	1	1	0
293	1	2	1	1	55	3	2	0	2	1	0	0	1	0	0	4	4	4	3	4	3	3	3	4	5	3	4	3	3	3	5	3	4	4	4	4	4	4	3	4	3	4	3	1	1	0	0	1	0
294	1	2	1	0	39	3	3	0	1	2	0	1	0	0	0	3	4	4	3	4	3	4	3	3	3	4	4	4	5	2	3	3	3	3	3	4	3	4	2	4	4	4	2	1	1	0	1	0	0
295	1	2	1	1	41	3	2	0	2	0	0	0	0	0	0	4	4	4	4	4	4	4	3	4	4	4	4	4	3	3	3	3	3	4	3	4	3	3	3	4	3	4	2	1	0	0	0	0	0
296	1	2	1	1	50	3	2	0	0	1	0	0	0	0	0	4	4	4	2	4	3	4	4	3	4	3	4	5	3	3	3	3	4	4	3	4	4	4	4	4	4	4	3	0	1	0	0	0	0
297	1	2	1	1	54	3	2	0	1	2	2	1	2	1	0	3	3	3	2	3	3	3	4	3	4	3	3	3	3	3	3	3	3	3	3	3	3	4	3	4	3	4	3	1	1	1	1	1	1
298	1	2	1	1	59	3	2	1	0	2	0	0	0	0	0	4	4	3	4	4	4	4	4	3	4	3	4	4	4	4	4	4	4	4	4	4	4	4	4	4	2	4	3	0	1	0	0	0	0
299	1	2	1	0	31	3	4	0	0	0	0	0	0	0	0	3	3	4	3	4	4	4	3	4	4	4	4	4	4	4	4	4	4	4	4	4	4	4	2	4	4	4	2	0	0	0	0	0	0
300	1	2	1	1	28	3	4	0	2	1	2		1	2		2	3	4	2	3	3	1	2	3	3	3	2	3	1	1	1	1	1	3	3	3	3	3	2	5	3	4	1	1	1	1		1	1
301	1	2	1	0	43	3	3	0	1	1		1	1		1	3	3	3	3	3	3	3	3	3	3	3	3	3	3	3	3	3	3	3	3	3	3	3	3	3	3	3	2	1	1		1	1
302	1	2	1	0	33	3	5	0	1	1					2	4	2	2	4	3	3	3	3	2	3	3	4	4	3	0	4	5	5	2	2	4	4	3	1	3	3	4	2	1	1
303	1	2	1	1	35	3	2	0	2							2	2	2	2	2	2	2	2	2	2	2	3	2	3	2	2	2	2	2	2	2	2	2	2	2	2	2	2	1
304	1			1	25				2	0	0	0	0	0	0	4	4	4	4	4	3	4	3	4	4	4	4	4	3	4	4	4	4	4	3	4	4	3	3	4	4	4	1	1	0	0	0	0	0
305	1	4	1	1	40	2	2	0	2	2	0	0	2	0	2	3	3	4	4	2	3	3	3	4	3	3	3	4	4	3	4	3	3	4	3	3	3	4	4	3	4	4	2	1	1	0	0	1	0
306	1	4	1	1	36	3	3	0	1	1	0	0	0	2	0	3	3	3	2	2	2	2	2	3	3	3	3	3	3	3	3	3	3	3	3	3	3	3	1	1	3	2	2	1	1	0	0	0	1
307	1	4	1	1	53	3	2	0	2	2	0	0	2	1	0	3	4	4	3	4	3	3	3	4	4	4	4	4	2	3	3	3	3	4	4	4	4	3	3	3	4	4	3	1	1	0	0	1	1
308	1	4	1	1	49	3	2	1	2	0	0	2	0	0	0	4	4	4	4	4	4	4	4	4	4	4	4	4	2	3	3	3	3	4	4	4	4	3	4	5	4	4	2	1	0	0	1	0	0
309	1	4	1	1	38	3	2	1	1	1	0	2	2	2	2	4	4	4	4	3	3	3	2	3	4	1	4	3	2	2	2	2	3	3	3	4	3	3	3	5	1	4	2	1	1	0	1	1	1
310	1	4	1	1	39	3	2	0	2	0	0	0	0	0	2	4	4	4	4	4	4	4	4	4	4	4	4	4	4	4	4	4	4	4	4	4	4	4	2	4	4	4	2	1	0	0	0	0	0
311	1	4	1			2	3	0	1	1	1	1	1	1	2	1	3	4	1	3	1	2	3	4	4	3	3	5	2	1	2	2	3	4	4	4	4	4	4	4	4	4	3	1	1	1	1	1	1
312	1	4	1			2		1	2	2	0	2	0	0	2	3	2	3	3	4	3	3	2	3	4	3	4	3	2	3	3	3	2	3	3	3	3	3	3	2	4	3	3	1	1	0	1	0	0
313	1	4	1	1	42	2		1	2	2	0	0	0	0	0	4	4	4	1	4	4	4		3	4	4	4	4	4	4	4	4	4	4	4	4	4	4	4	4	4	4	2	1	1	0	0	0	0
314	1	4	1	1	37		2	0	2	2	0	0	0	0	0	1	2	2	0	1	1	1	2	3	3	1	1	2	1	1	1	1	5	3	3	3	3	3	2	2	3	4	2	1	1	0	0	0	0
315	1	4	1	1	26	3	4	0	2	2	0	0	0	2	0	4	4	4	4	4	3	3	3	4	4	3	3	5	5	3	3	4	4	4	4	4	4	4	4	4	4	4	1	1	1	0	0	0	1
316	1	4	1			2	2	1	2	0	0	0	0	0	0	4	4	3	3	3	3	3	3	3	3	3	3	3	3	3	3	3	3	3	3	3	3	3	3	3	3	3	3	1	0	0	0	0	0
317	1	4	1	1	31	1	3	0	0	2	0	1	2	0	0	4	4	4	3	3	4	4	3	4	4	3	4	4	4	2	4	4	4	4	4	4	4	3	4	4	4	4	2	0	1	0	1	1	0
318	1	4	1	1	34	1	2	1	2	1	2	1	0	0	0	4	3	3	2	3	3	1	1	4	5	4	4	3	2	1	1	1	3	4	4	4	4	4	4	4	4	4	2	1	1	1	1	0	0
319	1	4	1	1	49	1	2	0	0	0	0	0	1	0	0	4	3	3	2	4	3	3	3	4	3	2	3	4	4	3	4	4	4	3	4	4	4	3	4	3	3	4	2	0	0	0	0	1	0
320	1	4	1	1	24	4	4	0	2	2	0	0	2	1	0	4	3	3	3	3	2	2	2	3	3	3	3	3	3	2	2	2	2	3	3	4	4	4	3	3	4	4	1	1	1	0	0	1	1
321	1	4	1		32	4	3	0	0	2	0	0	0	0	0	4	4	4	3	4	3	4	3	4	4	3	4	4	3	4	4	3	4	4	4	4	4	4	4	4	4	4	2	0	1	0	0	0	0
322	1	4	1	1	60	1	5	0	0	2	0	0	0	0	0	4	4	4	4	4	4	4	4	4	4	4	4	4	5	4	4	4	4	4	4	4	4	4	4	4	4	4	3	0	1	0	0	0	0
323	1	4	1	1	51	1	2	0	1	1	2		1	1	1	4	4	4	4	4	2	3	2	4		4	4	4	0	4	4	4	4	4	3	4	3	3	3	0	2	4	3	1	1	1		1	1
324	1	4	1	1	41	4	4	0	2	2	0	2	2	2	2	4	4	4	4	4	4	4	4	4	4	4	4	3	3	3	3	3	4	3	3	4	3	4	4	2	4	3	2	1	1	0	1	1	1
325	1	4	1	1	43	1	2	1	2	2	0	1	0	1	2	4	4	4	3	4	0	4	4	4	4	4	4	4	0	5	0	1	4	4	4	4	4	4	4	4	3	4	2	1	1	0	1	0	1
326	1	4	1	1	43	1	2	1	2	2	0	1	0	1	2	4	4	4	3	4	0	4	4	4	4	4	4	4	0	5	0	1	4	4	4	4	4	4	4	4	3	4	2	1	1	0	1	0	1
327	1	4	1	1	45	1	2	1	2	2	0	0	0	0	0	4	4	4	1	4	1	4	3	4	3	3	4	3	3	4	3	4	4	4	4	4	4	4	4	4	4	4	2	1	1	0	0	0	0
328	1	4	1	1	56	1	2	1	1	1	0	2	2	2	0	4	4	4	4	4	4	3	3	4	5	4	4	4	3	3	3	3	4	4	4	4	4	4	4	5	4	4	3	1	1	0	1	1	1
329	1	4	1	1		4	4	1	2	1	0	2	0	0	0	4	4	4	5	4	3	3	3	4	3	4	4	4	3	4	4	3	4	4	3	4	4	3	4	4	4	4	3	1	1	0	1	0	0
330	1	4	1	1	52	3	2	0	1	0	0	0	2	2	2	4	4	4		4	3	3	2	3	3	3	3	4	3	4	3	4	3	4	3	3	3	3	2	3	4	4	3	1	0	0	0	1	1
331	1	4	1	0	35	3	3	0	2	1	0	0	0	1	0	2	3	3	4	4	4	4	4	4	3	4	3	1	1	1	0	3	2	4	4	4	4	3	3	3	4	2	2	1	1	0	0	0	1
332	1	2	1	1	35	3	4	0	2	0	0	0	0	0	0	3	4	4	0	1	2	3	3	3	5	2	2	4	1	1	2	2	4	3	3	3	3	3	1	3	4	4	2	1	0	0	0	0	0
333	1	4	1	1	20	4	4	1	2	1	0	0	0	0	0	4	4	4	3	4	3	3	3	3	3	3	4	4	3	3	3	2	4	4	4	4	4	3	3	4	3	4	1	1	1	0	0	0	0
334	1	4	1	1	40	3	2	0	2	2	0	0	0	0	0	3	4	4	4	4	3	3	3	3	3	3	3	4	4	4	4	4	4	4	3	3	4	4	4	3	4	4	2	1	1	0	0	0	0
335	1	4	1			3	2	1	2							4	4	4	3	4	4	4	4	4	4	4	4	4	3	3	4	4	4	4	4	4	4	4	4	4	4	4	3	1
336	1	4	1	1	44	3	2	1	1	1	0	0	0	0	0	3	4	4	3	4	3	3	3	5	5	4	4	3	3	3	3	3	3	3	4	4	3	3	3	5	4	4	2	1	1	0	0	0	0
337	1	4	1	1	45	3	2	0	1	1	0	2	0	0	0	3	4	4	3	4	3	3	3	4	5	4	4	3	2	2	2	2	3	3	3	3	3	3	3	4	3	4	2	1	1	0	1	0	0
338	1	3	0	1	41	3	2	0	0	1	0	0	0	0	0	3	2	4	1	4	4	3	3	3	3	3	4	4	3	1	1	1	3	4	4	4	4	3	4	4	3	4	2	0	1	0	0	0	0
339	1	3	0	1	38	3			2	1	0	0	0	0	0	1	2	4	1	4	4	3	3	3	3	3	4	4	3	3	2	2	3	4	4	4	4	3	4	4	3	4	2	1	1	0	0	0	0
340	1	3	0	1	50	3	3	0	0	1	0	0	0	0	0	3	2	4	1	4	4	3	3	3	3	3	4	4	3	1	1	1	3	4	4	4	4	3	4	4	3	4	3	0	1	0	0	0	0
341	1	3	0	0	58	3	2	0	2	2	0	0	0	1	0	3	4	4	3	4	3	3	3	3	4	3	3	4	4	4	5	4	5	4	3	4	3	3	4	4	4	4	3	1	1	0	0	0	1
342	1	3	0	1	53	2	2	0	0	0	0	0	0	0	0	4	4	4	4	4	4	4	4	4	4	4	4	4	5	4	5	4	5	4	4	4	4	4	4	5	4	4	3	0	0	0	0	0	0
343	1	3	0	1		4	4	0	1	1	0	0	2	0	0	3	4	4	3	3	3	3	3	3	5	3	4	4	3	3	4	4	4	3	2	3	3	3	4	1	3	1	3	1	1	0	0	1	0
344	1	3	0	1		2	3	1	0	2	0	0	1	2	1	5	5	5	3	5	3	4	3	2	2	3	4	4	3	2	1	3	4	3	4	3	4	3	3	3	4	4	3	0	1	0	0	1	1
345	1	3	0	1	45	3	2	1	1	0	0	0	2	2	2											3	4	4	1	3	3	3	3	4	4	4	4	4	2	4	4	4	2	1	0	0	0	1	1
346	1			1	31	4	3	0	1	0	0	0	0	2	0	4	4	4	4	4	3	3	4	4	4	3	3	4	3	4	4	4	4	4	4	4	4	4	4	4	3	4	2	1	0	0	0	0	1
347	1	3	0	1	40	2	2	0	0	0	0	0	0	0	0	4	4	4	4	4	4	4	3	4	4	4	4	4	5	4	4	4	4	4	4	4	4	4	3	4	3	4	2	0	0	0	0	0	0
348	1	3	0	1		1	4	1	2	2	0	2	0	0	0	3	3	4		4	3	3	3	3	3	3	3	4	3	4	3	3	4	3	3	3	3	3	3	3	3	4	3	1	1	0	1	0	0
349	1	3	0	1	36	1	2	1	1	1	0	0	2	0	0	4	3	4	1	3	2	3	3	3	4	2	4	4	2	2	2	2	2	2	3	2	3	3	3	1	4	4	2	1	1	0	0	1	0
350	1	3	0	1	29	3	5	0	1	1	1	1	2	2	2	4	4	4	2	1	3	3	3	4	3	4	4	4	0	3	3	2	3	3	4	4	4	4	4	3	4	4	1	1	1	1	1	1	1
351	1	3	0	1	48	2	2	1	1	2	0	2	0	0	0	4	4	4	3	4	4		4	4	3	3	4	4	3	4	4	3	4	4	4	4	4	4	3	4	3	3	2	1	1	0	1	0	0
352	1	3	0	1	38	2	2	0	2	1	0	0	2	0	0	4	4	4	4	4	4	4	4	4	4	4	4	4	3	3	4	4	4	4	4	4	4	1	4	4	3	4	2	1	1	0	0	1	0
353	1	3	0	1		2	3	0	0	0	0	0	0	0	0	4	4	4	4	4	4	4	4	4	4	4	4	4	4	4	4	4	4	4	4	4	4	4	4	4	4	4	3	0	0	0	0	0	0
354	1	3	0	0	36	2	4	0	0	0	0	0	0	0	0	4	4	4	4	4	4	4	4	4	4	4	4	4	4	4	4	4	4	4	4	4	4	4	4	4	4	4	2	0	0	0	0	0	0
355	1	3	0	1	48	2	2	0	1	1	0	2	1	2	1	3	4	4	4	4	3	3	5	4	5	4	4	3	5	3	3	3	4	4	4	4	4	4	3	5	4	4	2	1	1	0	1	1	1
356	1	3	0	1	45	3	2	1	2	0	0	0	2	2	2	4	4	3	3	4	3	3	3	3	4	4	4	3	3	4	4	2	4	4	4	3	4	3	3	4	4	4	2	1	0	0	0	1	1
357	1	7	1	1	31	1	4	1	1	1	0	0	0	0	0	3	3	4	4	4	3	4	4	4	4	4	4	4	4	4	4	4	4	3	3	4	3	3	4	3	4	4	2	1	1	0	0	0	0
358	1	7	1	1	38	1	2	1	2	0	0	1	0	0	2	3	3	4	4	4	3	4	4	4	4	4	4	4	4	4	4	4	4	3	3	4	3	3	4	3	4	4	2	1	0	0	1	0	0
359	1			1	52	4	2	0	0	2	0	0	0	0	0	2	2	2	3	4	2	4	4	3	3	2	3	4	5	5	5	5	4	3	3	3	3	3	3	2	4	4	3	0	1	0	0	0	0
360	1	7	1	1	41	1	2	0	2	1	0	0	2	0	0	4	4	4	3	4	2	2	2	4	4	3	3	4	2	4	4	3	4	4	4	4	4	4	4	4	3		2	1	1	0	0	1	0
361	1	7	1	1	40	3	2	0	2	2	0	0	2	0	0	3	3	4	3	3	3	3	3	3	3	2	3	3	5	3	3	3	3	3	3	3	3	3	3	5	3	4	2	1	1	0	0	1	0
362	1	7	1	1	61	1	2	0	1	2	0	0	0	1	0	3	3	4	3	3	3	3	3	4	5	4	4	5	3	4	4	4	5	4	4	4	4	3	4	5	3	4	3	1	1	0	0	0	1
363	1	7	1	1	46	3	4		0	0	0	0	0	0	0	4	4	4	4	4	4	4	4	4	4	4	4	4	5	4	4	4	4	4	4	4	4	4	4	4	4	4	2	0	0	0	0	0	0
364	1	3	0	1		3	1	1	0	0	0	0	0	0	0	4	4	4	4	4	4	4	3	4	5	3	4	4	4	4	4	4	4	4	4	4	4	4	4	4	4	4	3	0	0	0	0	0	0
365	1	7	1	1	32	3	3	0	2	2	0	0	0	0	0	4	2	4	1	4	3	3	3	4	5	4	4	2	4	3	4	4	4	3	3	4	3	3	4	4	1	4	2	1	1	0	0	0	0
366	1	7	1	1	42	3	2	0	2	1	0	0	2	2	0	4	4	4	3	4	3	3	3	3	3	4	3	3	5	3	4	5	4	4	3	4	3	3	3	3	3	3	2	1	1	0	0	1	1
367	1	7	1	1	30	3	4	1	0	2	0	0	0	2	0	5	4	4	4	4	3	3	3	4	4	3	4	3	2	3	3	3	4	4	4	4	4	3	3	4	4	4	1	0	1	0	0	0	1
368	1	7	1	1	58	2	2	1	2	2	0	0	0	0	0	4	3	4	4	4	4	4	4	4	3	4	4	4	3	3	3	3	5	4	4	4	4	4	4	4	4	4	3	1	1	0	0	0	0
369	1	7	1	0	25	2	4	1	0	2	0	0	0	2	0	4	4	4	3	4	4	4	4	4	4	4	4	4	3	3	3	3	3	3	4	4	4	4	4	4	4	4	1	0	1	0	0	0	1
370	1	7	1	1	40	2	2	0	1	2	0	0	0	0	1	4	4	4	3	4	4	4	4	3	3	3	4	3	3	3	4	4	4	3	3	4	3	4	4	4	3	4	2	1	1	0	0	0	0
371	1	7	1	1	42	2	4	0	1	2	0	0	0	0	0	4	4	4	2	4	3	3	3	4	4	3	4	4	3	3	3	3	3	4	4	4	4	4	4	4	4	4	2	1	1	0	0	0	0
372	1	7	1	1	52	2	2	1	1	2	2	2	0	2	0	4	4	4	3	4	3	3	3	3	3	3	3	4	2	1	5	4	4	4	4	4	4	4	4		4	4	3	1	1	1	1	0	1
373	1	7	1	1	54	3	2	0	2	1	0	0	2	0	2	4	3	4	3	4	4	3	3	3	3	2	3	3		4	4	3	3	3	3	3	3	3	4	3	4	3	3	1	1	0	0	1	0
374	1	7	1	1	53	1	2	0	2	2	0	0	0	0	0	3	4	4	5	3	3	4	3	4	4	4	4	4	3	4	3	3	4	3	4	4	4	4	4	4	4	4	3	1	1	0	0	0	0
375	1	7	1	1	36	1	2	1	2	2	0	0	0	0	0	4	4	4	4	4	4	4	4	4	4	4	4	4	4	5	4	4	4	4	4	4	4	4	4	4	4	4	2	1	1	0	0	0	0
376	1	7	1	1	53	1	2	0	2	0	0	2	0	0	0	3	3	4	3	4	3	2	2	3	1	3	4	4	4	4	3	3	5	4	3	3	3	3	3	3	2	3	3	1	0	0	1	0	0
377	1	7	1	1	56	4	2	1	2	0	0	0	0	0	0	4	4	4	4	4	4	4	4		4	5	5	4	5	5	5	5	5	4	4	4	4	4	3	4	4	4	3	1	0	0	0	0	0
378	1	7	1	1	37	1	2	0								4	4	4	4	4	4	4	3	4	4	4	4	4	3	3	3	3	4	3	3	3	3	3	4	4	4	4	2
379	1	7	1	1	24	1	4	0	2	2	0	0	0	0	0	4	4	4	4	4	3	3	3	4	3	4	4	5	5	4	4	4	5	4	4	4	4	3	4	4	4	4	1	1	1	0	0	0	0
380	1	8	0	1		2	4	1	1	1	1	0	1	2	2	4	4	4	4	4	4	4	4	4	4	4	4	5	4	5	4	4	4	3	4	4	3	3	4	5	5	5	3	1	1	1	0	1	1
381	1	5	1	0	24	2	4	1	0	2	0	0	0	0	0																.												1	0	1	0	0	0	0
382	1	8	0	1	29	3	2	1	2	2	0	2	0	0	0																.												1	1	1	0	1	0	0
383	1	8	0	1	59	3	2	1	1	1	0	0	1	1	0	4	4	4	5	4	4	4	4	4	0	4	4	4	5	4	4	4	5	4	4	4	4	4	5	5	4	4	3	1	1	0	0	1	1
384	1	5	1	1	51	2	3	1	0	1	0	0	1	0	1	2	3	4	4	4	3	1	3	4	4	4	4	4	2	2	3	3	3	4	4	4	4	4	3	4	4	3	3	0	1	0	0	1	0
385	1	8	0	1	40	3	2	0	2	1	0	0	0	0	0	5	3	3	2	3	3	1	0	4		3	4	5	5	2	3	3	5	4	4	4	4	4	4	4	4	4	2	1	1	0	0	0	0
386	1	8	0	1	25	3	4	1	2	2	0	2	2	0	2	3	2	3	2	3	2	2	1	2	1	2	2	4	1	2	3	3	3	3	3	4	4	3	2	3	1	4	1	1	1	0	1	1	0
387	1	5	1	0	48	2	3	1	0	0	0	0	0	0	0	2	3	1	1	2	3	1	3	1	2	2	1	3	2	3	1	2	3	2	1	2	4	2	3	2	1	2	2	0	0	0	0	0	0
388	1	8	0	1	36	3		1	2	2	0	2	2	0	2	3	3	4	3	4	4	3	3	3	3	3	4	3	3	3	3	3	3	3	4	4	4	4	4	4	3	4	2	1	1	0	1	1	0
389	1	5	1	1	27		4	1	2	0	2	2	0	0	2	3	3	4	4	4	2	2	2	1	0	2	0	3	0	0	0	0	4	2	2	4	2	2	2	2	2	4	1	1	0	1	1	0	0
390	1	8	0	0	39	3	4	0	1	2	0	0	0	1	1	3	1	1	2	0	1	1	3	3	2	2	2	2	2		3	2	3	2	2	2	2	2	2	2	2	2	2	1	1	0	0	0	1
391	1	5	1	1	48	2	1	1	1	1	0	1	1	0	1	3	4	4		3	3	3	3	4	4	3	4	4	2	2	3	2	2	4	4	4	4	4	3	5	4	4	2	1	1	0	1	1	0
392	1	8	0	1	39	3	2	0	1	1	0	0	2	0	0	3	1	4	4	3	3	3	3	3	5	3	4	5	5	3	3	4	5	3	3	4	3	4	4	4	4	3	2	1	1	0	0	1	0
393	1	8	0	1	37	4	2	0	2	0	0	0	0	0	0	4	4	4	4	4	4	3	3	3	3	3	4	3	5	3	4	4	4	4	4	4	3	3	4	4	4	4	2	1	0	0	0	0	0
394	1	5	1	1	30	2	2	1	1	2	1	1	2	2	2	1	3	4	5	4	3	3	3	4	4	3	3	5	3	3	3	3	4	3	4	4	4	5	2	4	4	4	1	1	1	1	1	1	1
395	1	8	0	1	46	1	4	1	1	1	0	1	1	0	1	4	4	4	4	3	4	3	3	5	4	3	4	5	4	4	3	3	4	4	4	4	4	4	4	4	4	4	2	1	1	0	1	1	0
396	1	5	1	1	48	3	2	1	2	0	0	2	0	0	2	4	4	4	3	4	3	4	3	4	5	4	4	4	4	4	4	3	4	4	4	4	4	4	4	4	3	4	2	1	0	0	1	0	0
397	1	8	0	1	54	1	2	1	1	1	0	0	1	2	2	4	4	4	3	4	4	4	3	4	4	2	4	4	5	4	4	2	4	2	2	3	3	2	0	2	2	2	3	1	1	0	0	1	1
398	1	8	0	1	31	1	2	0	1	1	0	0	0	0	2	4	4	4	4	4	3	3	2	4	3	3	3	3	2	3	3	3	4	3	4	3	4	3	4	4	4	4	2	1	1	0	0	0	0
399	1	5	1	1	35	3	3	0	0	1	0	0	0	0	0	3	4	4	3	4	3	3	3	4	5	4	4	3	3	4	3	3	4	4	4	4	4	4	4	4	3	4	2	0	1	0	0	0	0
400	1	8	0	1	49	1		1	0	1	0	1	2	0	0	4	4	4	3	4	4	2	3	4	4	3	4	3	2	2	2	1	3	4	4	4	4	3	4	4	4	4	2	0	1	0	1	1	0
401	1	5	1	1	43	3	2	1	1	0	0	0	0	1	0	3	4	4	3	4	3	3	3	4	5	4	4	3	3	4	3	3	4	3	4	4	4	4	4	4	3	4	2	1	0	0	0	0	1
402	1	8	0	0	52	4		0	1	1	2	0	0	2	1	3	3	4	3	4	3	3	3	3	2	3	3	4	4	3	4	3	3	3	3	3	3	3	3	4	4	4	3	1	1	1	0	0	1
403	1	8	0	1	44	1	2	0	0	2	0	1	0	1	0	3	4	3	3	4	4	3	3	4	4	3	3	3	3	3	3	3	4	3	4	3	3	4	4	4	4	4	2	0	1	0	1	0	1
404	1	5	1	1	29	3	4	1	2	0	0	0	0	0	0	3	4	4	4	3	4	4	4	4	4	4	4	5	5	4	4	3	3	4	4	4	4	4	4	4	4	4	1	1	0	0	0	0	0
405	1	8	0	1		1	2	1	1	0	0	1	1	0	0	4	4	4	3	4	3	3	4	4	4	3	4	2	4	4	4	4	5		4	5	5	3	4	4	4	4	3	1	0	0	1	1	0
406	1	5	1	0	40	3	2	1	2	2	1	2	1	2	2	2	3	1	3	1	2	3	2	1	2	2	1	3	2	1	3	2	3	2	3	2	4	2	2	3	2	1	2	1	1	1	1	1	1
407	1	8	0	1	47	1	2	0	1	1	0	2	1	1	2	3	3	3	3	3	3	3	2	3	3	3	3	3	5	3	5	1	5	3	3	4	3	3	4	4	3	3	2	1	1	0	1	1	1
408	1	8	0	1	45	1	2	0	1	2	0	2	2	0	0	4	4	4	4	4	4	4	3	4	4	4	4	4	3	3	4	3	3	4	4	4	4	4	4	4	3	4	2	1	1	0	1	1	0
409	1	5	1	1	29	2	3	1	1	1	0	0	0	0	0	4	4	4	3	4	4	3	4	5	4	2	3	5	3	3	3	4	4	4	4	4	4	4	4	4	4	5	1	1	1	0	0	0	0
410	1	8	0	1	43	3	2	0	2	2	0	0	0	0	0	4	4	4	3	4	4	4	4	4	4	3	3	4	4	4	4	4	4	4	3	4	3	3	3	4	3	4	2	1	1	0	0	0	0
411	1	5	1	1	52	2	3	1								4	4	4	4	4	4	5	4	4	4	4	4	5	3	3	3	3	4	3	4	4	4	4	3	3	3	4	3
412	1	8	0	1		3	2	1	2	2	0	0	2	0	0	3	4	4	3	4	3	3	3	4	5	4	4	3	3	3	4	4	4	4	4	4	4	3	4	4	4	4	3	1	1	0	0	1	0
413	1	5	1	1	29	2	3	0	2	2	0	1	0	0	0	4	4	4	4	4	4	3	4	4	4	3	3	4	3	3	3	4	3	3	3	4	3	3	3	4	3	3	1	1	1	0	1	0	0
414	1	8	0	1	44	3	2	0	1	1	0	0	0	0	0	4	3	3	2	4	1	4	4	3	3	4	4	4	2	1	5	1	4	3	3	4	3	2	3	4	4	4	2	1	1	0	0	0	0
415	1	5	1	1	61	2	3	1	0	0	2	2	0	0	2	5	4	3	4	4	4	3	5	4	4	4	4	4	4	3	4	4	5	4	4	4	4	4	3	4	4	4	3	0	0	1	1	0	0
416	1	8	0	1	29	3	3	0	1	2	0	0	2	0	2	4	3	4	4	4	4	3	3	4	3	4	3	3	2	3	3	2	3	4	4	3	4	3	3	3	4	4	1	1	1	0	0	1	0
417	1	8	0	1	30	1	2	1	2	2	0	0	2	0	0	4	4	4	2	3	2	2	2	4	4	3	3	3	1	1	1	1	2	2	3	3	3	3	3	3	3	4	1	1	1	0	0	1	0
418	1	5	1	1	60	1	1	1	2	2	0	2	2	2	2	2	3	4	2	4	2	2	1	3	5	4	4	3	1	3	3	3	3	3	3	4	3	3	3	4	3	4	3	1	1	0	1	1	1
419	1	8	0	1		1	2	1	1	1	2	1	2	2	2	3	3	3	3	3	3	3	2	3	4	4	4	3	2	1	1	1	3	3	3	4	3	3	4	4	4	4	3	1	1	1	1	1	1
420	1	8	0	0	37	2	2	0	2	2	0	0	0	2	2	2	3	2	0	1	0	0	0	2	2	2	2	0	5	2	2	3	5	2	2	2	2	2	2	2	2	2	2	1	1	0	0	0	1
421	1	5	1	1	40	1	3	1	2	2	0	0	2	0	0	4	4	4	3	4	4	4	2	4	4	4	4	4	3	4	4	3	4	4	4	4	4	4	4	4	3	4	2	1	1	0	0	1	0
422	1	8	0	1	55	2	2	1	1	1	0	1	0	2	0	1	2	3	1	3	1	3	1	4	4	4	4	4	2	4	2	1	4	4	4	3	4	4	4	4	3	4	3	1	1	0	1	0	1
423	1	5	1	1	44	1	1	1	2	2	0	0	0	2	0	4	4	4	4	4	3	2	2	3	2	2	4	4	3	4	4	3	3	3	3	3	3	3	3	4	3	4	2	1	1	0	0	0	1
424	1	6	0	1	42	3	2	0	0	2	0	0	0	1	0	4	4	4	5	4	4	4	4	4	4	4	4	5	5	3	3	4	4	4	4	4	4	4	3	4	3	4	2	0	1	0	0	0	1
425	1	5	1	1	42	1	2	1	1	1	0	0	0	0	0	4	4		3	3	3	3	3	3	3	3	3	3	3	3	3	3	3	3	3	3	3	3	3	4	3	3	2	1	1	0	0	0	0
426	1	6	0	1	55	3	2	0	2	2	0	0	0	2	0	4	4	4	5	4	4	4	4	4	4	4	4	5	5	3	3	3	4	4	4	4	4	4	3	4	4	4	3	1	1	0	0	0	1
427	1	5	1	0	55	1	2	1	1	1	0	2	2	2	2	4	3	4	3	1	2	2	1	4	4	4	4	4	4	4	4	4	4	3	3	3	3	4	4	4	4	4	3	1	1	0	1	1	1
428	1	6	0	1	53	3	2	1	0	2	0	0	2	0	0	4	4	4	3	4	3	3	3	3	3	4	4	4	3	2	3	3	4	4	4	4	4	4	4	4	4	4	3	0	1	0	0	1	0
429	1	6	0	1	24	3	4	1	2	2	0	0	0	0	2	4	4	4	3	3	3	3	4	4	4	4	4	4	3	2	3	3	3	3	3	4	3	3	4	4	3	4	1	1	1	0	0	0	0
430	1	5	1	1	42	1	1	0	2	0	0	0	0	0	0	4	4	4	4	4	4	3	3	4	3	3	4	4	5	4	5	4	4	3	4	4	3	3	4	3	3	4	2	1	0	0	0	0	0
431	1	6	0	1	44	3	2	0	0	0	0	0	0	0	0	4	4	4	4	4	4	4	4	4	4	4	4	4	4	2	4	4	4	4	4	4	4	4	4	4	4	4	2	0	0	0	0	0	0
432	1	6	0	1	41	3	4	0	1	1	0	2	0	0	0	4	3	3	3	4	3	3	3	3	3	3	3	3	3	3	3	3	3	3	3	3	3	3	4		3	4	2	1	1	0	1	0	0
433	1	6	0	1	23	3	4	0	2	0	0	0	0	0	0	4	4	4	4	4	3	3	3	3	2	3	3	4	3	4	4	3	4	3	4	3	3	3	3	4	4	4	1	1	0	0	0	0	0
434	1	6	0	0	29	3	4	1	0	0	0	0	0	0	0	3	0	1	3	2	4	1	2	2	1	1	1	0	0	1	2	1	5	0	0	1	3	4	4	5	3	4	1	0	0	0	0	0	0
435	1	6	0	1	35	2	4	0	1	1	0	1	0	0	0	3	4	4	4	3	2	4	4	5	4	3	4	4	2	4	3	3	4	4	4	4	4	4	4	4	4	4	2	1	1	0	1	0	0
436	1	6	0	1	34	3	2	0	0	2	0	0	0	0	0	3	3	4	3	4	3	3	3	3	3	3	3	4	3	4	3	3	4	4	3	3	3	3	4	3	3	4	2	0	1	0	0	0	0
437	1	6	0			2	2	1	1	2	0	0	0	0	0	4	3	4	4	4	4	4	3	4	4	4	4	4	5	5	4	4	5	4	4	4	3	3	4	4	4	2	3	1	1	0	0	0	0
438	1	6	0	1	54	2	2	1	0	0	0	1	0	1	0	2	2	2	2	3	1	2	1	3	4	4	4	1	1	1	1	1	1	4	4	4	4	4	4	4	3	4	3	0	0	0	1	0	1
439	1	6	0	1	45	1	2	0	1	2	0	0	0	2	0	4	3	3	2	3	3	2	2	3	3	2	2	2	3	2	4	4	4	2	2	3	4	4	4	5	3	4	2	1	1	0	0	0	1
440	1	6	0	1	42	1	3	1	2	1	0	1	0	0	2	3	4	4	3	3	2	3	3	3	3	1	3	3	3	3	3	3	4	3	3	3	3	3	4	4	3	3	2	1	1	0	1	0	0
441	1	6	0	1	58	1	2	0	0	0	0	1	0	1	2	4	4	4	4	4	3	3	4	3	4	3	4	4	4	4	4	4	4	4	4	4	4	4	4	4	4	4	3	0	0	0	1	0	1
442	1	6	0	1	30	1	2	1	1	2	0	0	2	0	2	4	2	2	1	4	1	1	1	4	4	1	2	4	2	1	1	1	4	2	2	1	2	2	4	4	2	2	1	1	1	0	0	1	0
443	1	6	0	1		1	3	0	2	2	0	0	2	0	0	4	3	4	2	2	3	3	3	3	2	2	3	4	3	4	4	3	4	3	4	3	4	3	4	3	3	3	3	1	1	0	0	1	0
444	1	6	0	1	50	3	2	1	0	0	0	0	0	0	0	4	4	4	5	4	4	4	4	4	4	4	4	5	5	3	3	3	4	4	4	4	4	4	3	4	3	4	3	0	0	0	0	0	0
445	1	7	1	1	53	3	2		1	0	0	0	0	0	2	4	4	4	4	4	4	4	4	4	4	3	4	4	3	3	4	4	4	4	4	4	4	4	4	4	3	4	3	1	0	0	0	0	0
446	1	7	1	1	27	3	4	0	2	0	0	0	0	0	0	3	2	4	4	4	3	3	2	4	4	2	3	3	3	3	3	3	4	3	3	4	3	4	3	3	3	4	1	1	0	0	0	0	0
447	1	7	1	1	32	3	2	1	1	1	1	0	0	0	2	0	2	2	1	2	2	1	2	3	3	3	2	3	0	1	2	0	2	0	0	3	1	1	0	3	1	3	2	1	1	1	0	0	0
448	1	7	1	1	37	3	2	0	2	2	0	0	0	0	0	2	2	2	1	1	1	1	3	3	3	2	2	2	3	3	3	3	2	2	2	3	3	3	3	3	3	2	2	1	1	0	0	0	0
449	1	7	1	1	44	3	2	1	2	1	0	0	0	0	0	3	4	4	4	3	2	2	3	4	4	4	4	4	2	3	2	2	2	4	4	4	4	2	2	2	0	3	2	1	1	0	0	0	0
450	1	7	1	1	39	2	2	1	1	1	1	1	1	1	1	4	4	4	4	4	4	4	4	4	4	4	4	4	2	4	3	3	3	4	4	4	4	4	4	4	4	4	2	1	1	1	1	1	1
451	1	7	1	1	42	3	4	0	1	1	2	2	0	0	0	3	4	4	3	3	3	3	3	3	3	3	3	4	2	2	.	2	3	4	4	4	4	4	4	5	4	4	2	1	1	1	1	0	0
452	1	7	1	1	55	3	2	1								4	4	4	2	4	4	3	3	4	4	4	4	4	3	3	3	3	3	4	4	4	4	4	4	4	4	4	3
453	1	7	1	1	30	4	4	0	1	1	0	0	1	2	1	3	4	3	2	3	3	1	0	0	0	3	4	5	1	4	4	4	4	2	3	4	3	4	4	2	0	3	1	1	1	0	0	1	1
454	2	4	1	1	53	3	2	0	0	0	0	2	0	0	0	4	4	4	4	4	4	4	3	2	3	3		4	3	4	4	4	3	4	3	4		3	3	3	3	5	3	0	0	0	1	0	0
455	2	4	1	1		3	2	0	2	2	0	0	0	0	0	4	4	4	4	4	3	3	3	4	4	4		4	4	4	3	3	3	4	4	4		4	4	4	4	4	3	1	1	0	0	0	0
456	2	4	1	1		3	2	1	0	0	0	0	0	0	0	3	3	3	2	2	2	2	2	3	3	2	3	3	3	4	2	3	2	2	3	3		3	3	2	2	2	3	0	0	0	0	0	0
457	2	2	1	1		3			2	0	0	0	0	2	2	3	1	1	1	3	2	0	0	2	2	3	3	2	3	2	2	2	1	2	2	2		3	2	2	2	2	3	1	0	0	0	0	1
458	2	3	0	1	49	1	2	1	2	2	0	1	0	0	0	3	4	4	4	4	3	3	3	4	3	4	4	4	3	3	3	3	4	4	4	4		3	3	4	3	3	2	1	1	0	1	0	0
459	2	3	0	1	49	2	2	0	1	1	0	1	1	2	1	4	4	4	4	4	3	3	4	4	5	4	4	3	1	3	3	3	3	4	4	4		4	2	5	3	4	2	1	1	0	1	1	1
460	2	3	0	1	54	2	2	0	1	0	0	0	0	0	0	4	4	4	3	4	4	4	4	4	3	4	4	4	4	4	4	3	4	4	4	4		4	4	4	4	4	3	1	0	0	0	0	0
461	2	3	0	1	34	2	3	0	0	0	0	0	2	0	0	4	4	4	4	4	3	3	4	4	4	3	4	4	3	3	4	4	4	2	3	3		3	4	4	2	3	2	0	0	0	0	1	0
462	2	3	0	1	23	1	4	0	1	1	0	0	0	0	0	3	2	2	1	3	2	2	2	3	3	2	3	3	2	3	3	3	3	1	2	3		1	3	3	4	4	1	1	1	0	0	0	0
463	2	3	0	1	38	2	2	0	0	2	0	0	0	0	0	4	4	4	4	4	4	4	4	4	4	4	4	4	4	4	4	4	4	4	4	4		4	4	4	4	4	2	0	1	0	0	0	0
464	2	3	0	1	45	2	2	0	0	0	0	0	0	0	0	4	4	4	4	4	4	4	4	4	4	4	4	4	4	4	4	4	4	4	4	4		4	4	4	4	4	2	0	0	0	0	0	0
465	2	3	0	1	30	4	5	0	1	1	0	2	2	0	0	4	4	4	4	4	4	4	4	4	4	4	4	4	2	3	3	4	4	4	4	4		4	4	4	4	4	1	1	1	0	1	1	0
466	2	3	0	0	37	2	4	0	0	0	0	0	0	0	0	4	4	4	4	4	4	4	4	3	4	3	4	4	4	4	4	4	4	4	4	4		4	4	4	4	4	2	0	0	0	0	0	0
467	2	3	0	1		2	3	0	0	0	0	0	0	0	0	5	4	2	1	4	4	4	4	3	3	4	3	4	2	0	2	2	2	4	4	3		3	3	4	4	4	3	0	0	0	0	0	0
468	2	5	1	1		3	4	1	2	2	0	0	0	0	0	3	4	4	4	3	2	2	2	4	4	3	3	4	2	3	2	2	4	3	3	3		4	4	4	4	2	3	1	1	0	0	0	0
469	2	5	1	0	50	3	2	1	2	2	0	0	2	0	0	3	5	4	2	2		3		4		4		3		4	3	3		4	5	3		4	4	4	3	4	3	1	1	0	0	1	0
470	2	5	1	1	36	3	3	0	2	0	0	0	0	0	0	4	4	4	3	4	3	4	4	4	5	4		4	3	4	4	4	4	4	4	4		4	4	4	4	4	2	1	0	0	0	0	0
471	2	5	1	1	49	3	2	1	2	0	0	2	0	0	0	4	3	4	4	4	4	3	4	4	5	4	4	4	4	4	4	4	4	4	4	4		4	4	4	4	4	2	1	0	0	1	0	0
472	2	5	1	1	62	3	3	1	0	0	2	2	0	2	0	5		4	2	4	0	2		3		4		4		4	5	4	5	3		4		3	5	4	4	4	3	0	0	1	1	0	1
473	2	6	0	1	43	1	3	1	2	2	0	2	0	0	0	4	4	3	4	4	3	3	3	3	3	2	3	4	3	4	4	3	4	3	3	3		3	4	3	3	3	2	1	1	0	1	0	0
474	2	6	0	1	36	4	2	0	2	2	0	0	0	0	0	3	4	4	3	4	3	3	3	3	3	3	4	4	3	4	3	4	4	4	4	4		4	4	4	4	4	2	1	1	0	0	0	0
475	2	6	0	1	36	2	4	0	2	2	0	0	0	0	0	4	4	4	1	4	3	4	3	3	4	4	4	4	1	3	3	3	3	4	4	4		4	4	4	4	3	2	1	1	0	0	0	0
476	2	6	0	1	50	1	2	0	2	1	0	2	1	1	1	4	3	3	0	1	1	1	3	1	1	1	2	1	3	2	0	1	1	3	2	3		2	2	1	4	4	3	1	1	0	1	1	1
477	2	2	1	1		2	2	1	0	0	0	0	0	0	0	3	2	1	2	2	2	2	3	4	4	3	3	3	2	2	2	3	2	3	4	4		4	3	3	3	4	3	0	0	0	0	0	0
478	2	2	1			1			2	2	0	0	0	0	0	2	2	4	5	5	3	3	2	4	3	3	3	3	2	3	4	4	3	3	2	3		3	3	3	3	3	3	1	1	0	0	0	0
479	2	2	1			1			2	2	0	0	0	0	0	4	3	4	3	4	3	3	3	3	3	3	3	4	3	4	4	3	3	3	4	4		3	3	4	3	3	3	1	1	0	0	0	0
480	2	2	1	1		1			0	0	0	0	0	0	0	4	2	2	2	4	2	2	3	3	2	3	3	2	3	3	2	2	3	1	2	2		2	1	2	2	3	3	0	0	0	0	0	0
481	2	2	1	1	41	1	5	1	0	0	0	0	0	0	0	0	4	4	4	4	3	4	4	4	4	4	4	4	4	4	4	4	4	4	4	4		4	4	4	4	4	2	0	0	0	0	0	0
482	2	2	1	1	45	1	2	1	2	0	0	1	2	0	2	3	4	4	1	4	3	3	3	4	4	3	3	4	3	3	3	3	3	3	4	4		4	3	4	3	4	2	1	0	0	1	1	0
483	2	2	1	1	30	1	3	0	2	0	0	0	0	0	0	4	4	4	4	3	4	4	3	4	4	4	4	4	3	3	3	3	4	4	4	4		4	4	4	4	4	1	1	0	0	0	0	0
484	2	2	1		25	4	2	0	2	2	0	0	2	2	0	3	4	4	4	3	4	4	4	3	3	3	4	4	4	4	4	4	4	4	3	4		3	4	4	4	4	1	1	1	0	0	1	1
485	2	2	1		55	1	2	0	2	2	0	2	0	0	0	3	4	4	3	4	3	3	3	3	3	3	4		4	4	4	4	4	3	4	3		4	4		3	3	3	1	1	0	1	0	0
486	2	2	1	1	43	1	2	0	2	0	0	0	0	1	2	4	4	4	5	4	3	4	3	3	4	3	4	4	3	3	4	3	4	4	4	3		4	4	5	4	4	2	1	0	0	0	0	1
487	2	2	1	1	60	1	2	1	2	2	0	2	0	0	0	3	4	4	2	4	5	2	2	3	3	3	4	3	3	3	3	3	5	3	3	3		3	3	4	4	4	3	1	1	0	1	0	0
488	2	2	1	1	54	3	2	1	1	0	0	0	2	2	0	3	4	4	3	4	3	4	3	4	4	4	4	3	3	3	3	3	3	4	4	4			3	5	4	4	3	1	0	0	0	1	1
489	2	2	1	1	56	3	2	0	2	0	0	2	2	0	0	3	4	4	5	3	3	3	3	4	5	3	4	3	5	4	4	3	5	4	4	4		4	4	3	3	4	3	1	0	0	1	1	0
490	2	2	1	1	50	3	2	0	2	1	0	0	2	0	2	4	4	4	3	4	4	3	3	4	5	4		4	3	3	4	3	4	4	4	4		4	3	4	4	4	3	1	1	0	0	1	0
491	2	2	1	1	34	3	2	1	0	0	0	0	0	0	0	3	4	4	3	4	4	3	3	4	4	3	4	4	3	3	3	4	4	4	4	4		4	4	3	4	4	2	0	0	0	0	0	0
492	2	2	1	1	58	3	2	1	1	1	0	1	1	0	0	3	4	4	3	5	3	4	3			4	4	4	3	3	3			4	4	4		4	3	4	4	4	3	1	1	0	1	1	0
493	2	2	1	0	29		4	0	0	0	0	0	0	0	0	4	4	4	3	4	3	3	3	3	3	4	4	2	2	3	3	3	3	3	4	4		4	4	4	3	4	1	0	0	0	0	0	0
494	2	2	1	1	51	1	2	1	1	1	1	1	1	1	1	0	1	0	0	0	0	1	0	2	2	0	0	1	3	1	5	1	5	1	1	3		1	2	5	4	1	3	1	1	1	1	1	1
495	2	2	1	0	58	3	2	0	1	1	0	1	2	2	0	3	4	4	3	3	2	3	3	3		3	3	4	3	3	2	2	3	4	3	3		3	4	4	3	3	3	1	1	0	1	1	1
496	2	4	1	1	55	3	2	0	0	1	0	0	0	1	1	4															.												3	0	1	0	0	0	1
497	2	4	1	1	40	3	2	0	1	1	0	0	1	0	1	4	4	4	0	4	1	1	1	3	4	4	4	3	1	1	1	0	1	4	4	4		4	3	4	4	4	2	1	1	0	0	1	0
498	2	4	1	1	39	3	2	0	2	1	0	0	2	0	2	4	4	4	0	4	1	1	1	3		4	4	4	0	1	1	0		4	4	3		4	3	5	3	4	2	1	1	0	0	1	0
499	2	2	1	1		1	2	1	1	1	0	0	0	0	0	3															.												3	1	1	0	0	0	0
500	2	2	1	1		1	4	1	2	2	0	2	0	0	0	1	2	4	2	3	1	1	2	3	4	4	4	3	3	2	2	2	3	3	2	3		4	4	3	3	3	3	1	1	0	1	0	0
501	2	2	1	1	45	1	2	0	2	2	0	0	0	0	0	4	3		3	4	4	3	3	3	2	3	2	3	2	2	2	2	2	3	3	3		3	3	3	3	3	2	1	1	0	0	0	0
502	2	2	1	1	48	1	2	0	0	1	0	0	2	0	2	3	4	4	4	3	3	3	3	4	4	4	4	4	4	4	4		4	4	4	4		4	4	4	4	4	2	0	1	0	0	1	0
503	2	2	1	1		1		0	0	0	0	0	0	0	0	2	3	4	3	3	3	3	3	3	3	3		3	5	3	3	3	3	3	3	3		3	3	4	4	3	3	0	0	0	0	0	0
504	2	4	1	1	58	2	2	0	0	0	0	0		2	0	3	3	4	4	3	4	3	3	3	2	2	2	2	2	3	3	3	2	3	3	3		3	3	3	3	3	3	0	0	0	0		1
505	2	4	1	1	27	2	4	0	1	2	0	0	0	0	0	4	3	3	2	3	3	3	2	3	3	2	3	5	3	3	3	3	3	3	4	3		2	3	2	2	3	1	1	1	0	0	0	0
506	2	4	1	1		2	2	1	1	2	0	0	0	2	0	4	3	4	3	4	3	3	4	3	3	3	4	5	2	3	4	3	4	4	4	4		3	4	4	4	4	3	1	1	0	0	0	1
507	2	4	1	1		2	4	0	2	2	0	0	0	0	0	4	4	4	3	4	2	2	2	3	3	3	2	3	2	3	2	2	2	4	4	4		3	3	4	4	4	3	1	1	0	0	0	0
508	2	4	1	1	36	2	2	0	2	2	0	0	0	0	0	1	4	4	4	3	4	3	2	3	3	3	4	3	2	3	3	3	3	4	3	4		4	3	3	4	4	2	1	1	0	0	0	0
509	2	4	1	0	38	2	2	1	2	0	0	0	0	0	0	4	1	1	1	0	1	1	1	1	2	2	2	2	1	2	1	1	2	2	3	3		3	3	3	1	4	2	1	0	0	0	0	0
510	2	4	1	1	39	3	2	1	1	1	0	2	1	0	1	3	3	3	2	3			3	3	3	4	3	4	3	3	2	3	3	3	4	4		4	4	5	4	4	2	1	1	0	1	1	0
511	2	4	1	1	35	1	2	1	0	1	2	0	2	0	0	3	5	4	3			2	4	4				3	3		3	3	4	3	3	4		2	3	4	3	4	2	0	1	1	0	1	0
512	2	4	1	1	41	1	2	0	2	2	0	0	1	1	2	3	3	4	0	0	3	3	3	3	5	3	4	3	0	0	0	0	0	4		4		3	5	5	4	4	2	1	1	0	0	1	1
513	2	4	1	1	43	1	2	1	2	2	0	2	0	2	2	3	3	4	4	3	3	3	3	3	3	3	4	4	3	3	3	3	4	3	4	4		4	4	4	4	4	2	1	1	0	1	0	1
514	2	4	1	1		1	2	0	1	1	0	2	2	2	0	3	4	4	4	4	3	4	4	4	4	4	4		0	0	0	0	4	4	4	4		4	4	4	4	4	3	1	1	0	1	1	1
515	2	4	1	1		1	2	1	2	2	0	2	0	0	0	4	4	4	4	4	4	4	3	4		4	4	4	1	3	3	4	3	4	4	4		4	4	4	4	4	3	1	1	0	1	0	0
516	2	2	1	1	27	3	5	0	0	0	0	0	0	0	0	3	4	4	3	4	3	3	4	4	4	4	4	4	3	5	3	3	3	4	3	4		3	4	5	3	4	1	0	0	0	0	0	0
517	2	2	1			3	2	1	2	2	0	0	2	2	0	4	4	4	3	3	3	4	3	4	3	3	4		3	3	3	3	3	4	4	4		4	3	4	4		3	1	1	0	0	1	1
518	2	2	1	1	59	4	2	1	2	2	0	0	0	1	0	3	4	3	3	4	4	4	3	4	4	4	4	4	3	3	3	3	3	4	4	4		4	4	4	4	4	3	1	1	0	0	0	1
519	2	2	1	1	38	3	2	0	0	0	0	0	0	0	0	2	3	3	4	4	3	3	4	3	4	4	4	4	4	3	.	3	4	4	4	4		4	4	4	2	4	2	0	0	0	0	0	0
520	2	5	1	1	29	2	3	0	2	1	0	0	0	0	0	4	3	2	2	3	3	3	3	4	5	4	4	5	3	3	3	3	3	3	4	4		4	4	4	4	4	1	1	1	0	0	0	0
521	2	5	1	0	24	2	4	1	0	0	0	0	0	0	0	4	4	4	4	4	3	3	4	4	4	3	4	3	5	4	3	4	4	4	4	4		3	3	4	3	4	1	0	0	0	0	0	0
522	2	5	1	1	30	2	3	1	0	1	0	0	0	0	0	4	4				3	3	3	3		3	4	4	3	4	3	4	4	3	4	4		3	3	4	3	3	1	0	1	0	0	0	0
523	2	6	0	1	46	1	2	0	2	2	0	0	0	0	0	4	4	4	4	4	3	3	4	2	2	4	4	4	2	4	4	4	4	4	4	4		4	4	3	4	4	2	1	1	0	0	0	0
524	2	6	0	1	56	3	2	0	2	0	0	0	0	0	0	4	3	4	2	4	2	3	3	3	5	3	3	5	2	3	4	3	4	2	3	3		3	4	4	3	4	3	1	0	0	0	0	0
525	2	6	0	1	69	3	2	0	0	2	0	0	0	2	0	4	4	4	5	4	4	4	4	4	5	4	4	5	3	4	4	4	4	4	4	4		4	4	4	4	4	3	0	1	0	0	0	1
526	2	6	0	1	51	3	2	1	0	0	0	0	0	0	0	4	4	4	5	4	5	4	4	5	3	4	4	4	4	4	4	4	4	4	4	4		4	4	4	4	4	3	0	0	0	0	0	0
527	2	6	0	1	40	4	4	0	2	1	0	0	2	0	0	4	4	4	5	4	4	4	4	4	5	4	4	5	3	4	4	4	4	4	4	4		4	4	4	4	4	2	1	1	0	0	1	0
528	2	6	0						1	2	0	0	2	0	1	2	4	4	3	4	3	3	3	3		2	2	5	5	4	4	4	5	4	4	4		4	4	3	3	4	3	1	1	0	0	1	0
529	2	2	1	0	26	3	4	1	0	0	0	0	0	0	0	4	1	1	2	2		2	2	4	4	4	3		3	3	3	4	3	4	4	3		4	4	4	4	4	1	0	0	0	0	0	0
530	2	2	1	1	24	3	4	0	0	0	0	0	0	0	2	2	4	4	4	4	4	4	4	4	4	4	4	5	3	3	5	4	4	4	4	4		4	4	5	4	4	1	0	0	0	0	0	0
531	2	2	1	1		3	2	1	0	0	0	0	2	0	0	2	1	4	0	2	0	4	3	4	3	3	4	4	5	2	3	4	4	3	3	3		4	4	3	4	3	3	0	0	0	0	1	0
532	2	2	1	1	41	3	2	0	2	2	0	2	2	2	2	2	4	4	4	4	3	3	3	3	1	3	3	2	3	1	1	2	3	4	4	4		4	5	5	2	4	2	1	1	0	1	1	1
533	2	2	1	1	51	3	2	0	2	0	0	0	0	0	0	3	3	4	1	2	2	2	1	1		3	3	4	3	2	1	1		3	3	3		3	3	3	3	4	3	1	0	0	0	0	0
534	2	2	1	0	23	3	4	1	2	0	0	0	0	0	0	4	4	4	3	4	3	3	3	3	4	3	4	4	3	3	3	3	3	4	4	3		4	3	4	4	4	1	1	0	0	0	0	0
535	2	2	1	1	35	3	3	0	2	0	0	0	2	0	0	4	3	3	4	3	3	3	3	3	3	4	4	4	4	2	3	3	3	3	3	4		3	4	4	4	4	2	1	0	0	0	1	0
536	2	2	1	1	23	3	4	1	2	2	0	0	0	0	0	4	4	4	3	4	4	4	3	4	4	3	3	3	3	3	4	4		4	4	4		4	4	4	4	4	1	1	1	0	0	0	0
537	2	2	1	1	23	3	4	0	0	0	0	0	0	0	0	4	4	4	4	4	4	3	3	3	3	3	3	4	3	3	4	3	4	4	4	4		4	3	4		3	1	0	0	0	0	0	0
538	2	2	1	1	39	3	2	1	2	1	0	0	0	0	0	3	4	4	2	4	3	3	3	1	2	2	3	4	4	4	4	4	4	4	3	3		3	4	4	4	4	2	1	1	0	0	0	0
539	2	7	1	1	54	3	2	0	2	2	0	0	0	0	0	4	2	4	3	3	2	2	2	4	3	4	4	3	4	4	3	4	3	4	4	4		4	4	3	5	4	3	1	1	0	0	0	0
540	2	7	1	1	45	3	2	0	1	2	0	0	0	0	0	3	4	4	5	3	4	5	4	4	3	4	4	4	5	4	5	4	4	4	4	4		4	4	4	4	4	2	1	1	0	0	0	0
541	2	7	1	1	45	3	2	1	1	1	0	2	0	0	2	2	3	4	3	3	2	2	3	3	4	3	4	4	3	2	3	4	3	4	4			4	4	4	4	4	2	1	1	0	1	0	0
542	2	7	1	1	28	3	5	0								3	4	4	3	2	2	2	2	3	3	3	3	5	3	3	2	3	3	3		4		4	2	1	4	4	1
543	2	7	1	1	32	3	2	1	1	1	0	2	0	0	0	2	4	4	3	4	3	3	3	3	3	3	4	4	4	4	4	4	4	3	4	4		3	4	3	4	4	2	1	1	0	1	0	0
544	2	7	1	1	35	2	2	1	2	2	0	0	1	1	1	3	1	2	2	1	2	3	4	4	3	3	3	4	1	1	1	1	3	0	0	1		2	3	4	3	4	2	1	1	0	0	1	1
545	2	8	0	1	59	2	2	1	1	1	0	1	0	0	0	3	4	4	3	4	3	3	3	3	3	3	3	3	3	5	4	3	3	3	3	3		4	4	4	3	4	3	1	1	0	1	0	0
546	2	8	0	1	53	2	2	1	1	1	0	2	2	2	2	3	4	4	4	4	3	3	3	3	5	3	4	5	3	3	3	1	4	4	4	4		3	4	4	3	4	3	1	1	0	1	1	1
547	2	8	0		27	2	4	0	0	2	0	0	0	2	0	4	4	4	3	4	3	3	3	4	4	4	4	4	3	3	3	3	3	4	4	5		4	3	4	4	4	1	0	1	0	0	0	1
548	2	8	0	1	33	2	4	0	1	1	0	1	0		0	4	4	4	4	4	4	4	0	3	3	3	3	4	4	4	4	4	4	3	3	4		3	4	4	3	4	2	1	1	0	1	0
549	2	8	0	1	41	1	2	0	1	2	0	0		0	0	4	4	4	4	4	4	4	0		3	3	3	3	4	4	4	4	4	3	3	4		3	4	4	3	4	2	1	1	0	0		0
550	2	8	0	1	36	3	2	1	1	1	0	0	2	2	2	3	4	4	4	4	3	3	2	3	3	4	4	4	2	3	3	3	3	3	4	4		3	3	3	4	4	2	1	1	0	0	1	1
551	2	8	0	1	44	3	2	0	2	2	0	0	0	0	2	4	3	4	3	4	4	3	2	2	2	2	2	2	2	2	2	2	2	2	2	2		2	2	2	2	2	2	1	1	0	0	0	0
552	2	3	0	1	35	1	3	0	2	1	0	0	2	0	0	4	4	4	4	4	4	4	4	3	4	3	3	4	4	4	4	4	4	4	3	4		3	3	4	3	4	2	1	1	0	0	1	0
553	2	3	0	1	22	4	4	0	2	2	0	0	0	2	1	3	4	4	4	4	4	4	4	4	4	4	4	4	4	4	4	4	4	4	4	4		4	4	4	4	4	1	1	1	0	0	0	1
554	2	3	0	1	59	1	2	1	1	2	0	2	2	0	0	1	3	4	4	4	3	3	3	4	3	3	3	5	3	3	2	3	4	3	4	4		3	4	4	4	4	3	1	1	0	1	1	0
555	2	3	0		54	1		1	2	2	0	0	0	0	1	3	3	3	3	2	3	3	3	3	3	3	3	3	3	3	3	3	3	2	3	3		2		3	3	3	3	1	1	0	0	0	0
556	2	3	0	0	57	1	2	0	1	0	0	0	2	1	0	4	3	2	2	4	3	4	3	4		4	4	3	3	3	3	3	4	4	4	4		3	4	4	4	4	3	1	0	0	0	1	1
557	2	3	0	1	37	1	2	1	2	1	0	0	2	2	2	3	4	4	4	4	3	4	4	4	4	3	4	4	4	4	3	3	4	4	4	4		4	3	4	4	4	2	1	1	0	0	1	1
558	2	3	0	1	52	4	2	0	2	0	2	2	0	0	0	4	3	3	4	4	5	4	3	4		3	4	3	3	0	3	3	3	4	4	3		3	4	2	3	4	3	1	0	1	1	0	0
559	2	3	0	0	47	2	3	1	0	0	0	0	0	0	0	4	4	4	4	4	4	4	4	4	3	4	4	4	4	4	4	4	4	4	4	4		4	4	4	4	4	2	0	0	0	0	0	0
560	2	3	0	1		1	2	0	1	0	0	0	0	0	0	4	4	4	4	4	3	3	4								.												3	1	0	0	0	0	0
561	2								2	1	0	1	0	1	1	3	4	4	5	4	3	3	4	4	4	4	4	4	3	4	4	4	4	4	4	4		4	4	4	4	4	3	1	1	0	1	0	1
562	2	5	1	1	65	3	2	1								5	0	4	4	3	3	4	3	4	0	4	4	4	4	2	2	2	2	4	4	4		4	4	4		4	3
563	2	5	1						2	0	2	2	0		0	3	5	5	5	5	5	5	5	5	5	5	5	5	5	5	5	5	5	5	5	5		5	5	5	5	5	3	1	0	1	1	0
564	2	5	1	1	45	2	3	1	0	0	1	1	0	0	1	4	3	3	4	4	4	4	4	4	5	4	4		4	4	4	4	4	3	3	4		4	4	4	3	4	2	0	0	1	1	0	0
565	2	5	1	0	48	2	3	1	0	0	0	0	0	1	0	3	4	4	4	4	4	4	4	4	3	4	4	4	4	4	4	4	4	4	4	4		4	4	4	4	4	2	0	0	0	0	0	1
566	2	5	1	1	49	2	1	1	1	1	0	0	0	0	0	3	4	0	0	4	1	1	4	1	1	2	2	3	4	4	3	2	3	2	3	4		3	4	4	3	3	2	1	1	0	0	0	0
567	2	5	1			2	3	1	0	0	0	0	0	0	1	4		4	2	4		3		3		3		4	0	2	0	1		4		3		3	4	4	4	4	3	0	0	0	0	0	0
568	2	5	1	1	55	2	2	1	1	0	0	0	0	0	0	4	4	4		4	4	4	4	4		4		4		3	3	3		4		4		4	3	1		4	3	1	0	0	0	0	0
569	2	5	1	1	24	1	4	1	1	1	0	1	0	0	0	4		4	2	4	4	4	4	3	0	4	4	5	3	4	2	4	4	4	4	4		4	4	4	4	4	1	1	1	0	1	0	0
570	2	5	1	0	35	1	1	1	0	0	0	0	0	0	0	4		4	4	4	3	3	4	4	4	4	4	4	3	4	4	3	4	4	4	4		4	4	4	4	4	2	0	0	0	0	0	0
571	2	5	1		56	1	2	1	2	2	0	0	2	0	2	4	4	4	4	4	4	4	4	4	4	4	4	4	4	4	4	4	4	4	4	4		4	4	4	4	4	3	1	1	0	0	1	0
572	2	5	1	1	43	1	1	0	2	2	0	0	0	0	0	3	4	4	4	4		3	4	4	4	4	4	3	3	4	3	4	4	4	3	4		4	4	4	3	4	2	1	1	0	0	0	0
573	2	5	1	1	45		1	1	2	2	0	0	0	2	0	4	2	3		3		3	3	4		3		4		3	3	3		3		4		4	3	4	3	4	2	1	1	0	0	0	1
574	2	5	1	1	25	1	4	1	2	2	0	0	2	2	1	3	4	4	4	4	4	3	3	4	3	4	3	4	4	5	4	3	5	3		3		3	4	4	3	4	1	1	1	0	0	1	1
575	2	5	1	0	34	1	2	0	0	0	0	0	0	0	0	3	4	4	4	2	3	3	3	3	3	4	4	4	3	3	3	3	4	4	4	4		4	4	4	4	4	2	0	0	0	0	0	0
576	2	5	1	1	30	1	4	1	2	2	0	0	0	0	2	4		4	1	1		3		4		3		3		3	4	4		4		4		4	4	4	4	4	1	1	1	0	0	0	0
577	2	5	1	1	29	1	3	1	1	0	0	0	0	0	0	3	3	4	4	3	4	2	3	3	2	4	4	4	2	0	2	3	3	3	3	4		4	5	5	4	4	1	1	0	0	0	0	0
578	2	5	1	1	29	1	3	1	1	1	2	2	1	1	1	2	3	4	3	4	4	3	3	4	4	4	4	4	3	3	3	3	5		3	4		3	3	3	3	4	1	1	1	1	1	1	1
579	2	2	1	1		3	2	0	2	2	0	2	2	2	0	3	4	3	1	3	0	0	0	3	3	2	4	4	1	2	1	0	2	4	4	3		4	3	4	4	3	3	1	1	0	1	1	1
580	2	2	1													3		4	2	4	3	3	3	3	3	3	4	5	3	1	2	2	2	3	3	3		3	3	4	4	4	3
581	2	2	1	1	36	1	3	0	0	0	0	0	0	0	0	4	3	4	2	3	3	3	3								.												2	0	0	0	0	0	0
582	2	2	1	1	39	1	2	1	2	0	0	0	2	0	0	3	4	4	4	4	4	4	4	4	4	4	4	4	4	4	4	4	4	4	4	4		4	4	4	4	4	2	1	0	0	0	1	0
583	2	2	1	1	61	1	2	0	1	1	2		2	2	0		3	2	2	3	2	2	1	3	3	3	3	3	2	5	5	3	3	3	3	3		2	4	4	4	4	3	1	1	1		1	1
584	2	8	0	1	41	1	2	0	0	2	0	0	0	2	2	4															.												2	0	1	0	0	0	1
585	2	8	0	1	43	1	2	1	2	2	2	2	2	2	2	2	4	4	4	4	3	3	1	3	5	3	3	4	4	4	4	4	4	4	4	4		4	3	4	4	3	2	1	1	1	1	1	1
586	2	8	0	1	23	1	5	0	2	2	0	0	2	0	0	4	3	3	2	3		2	1	2	3	2	2	2	2	1	1	2	2	3	3	2		2	2	2	3	3	1	1	1	0	0	1	0
587	2	8	0	1	39	3	2	0	1	2	0	0	0	0	0	3	4	4	4	4	4	3	1	3	3	4	4	4	3	4	3	3	4	3	4	4		4	4	3	4	4	2	1	1	0	0	0	0
588	2	8	0	1	38	3	2	0	2	0	0	0	2	0	2	3	2		3	5	3	3	3	3	4	3	4	5	3	2	3	4	4	3	3	4		3	4	4	4	3	2	1	0	0	0	1	0
589	2	8	0	1	40	3	2	1	0	0	0	0	0	0	0	4	2	2	3	2	3	2	2								.												2	0	0	0	0	0	0
590	2	8	0	1	39	3	4	1	2	0	0	0	0	0	0	5	3	3	4	4	3	3	3	4	4	4	4	5	3	4	3	3	5	4	4	4		4	3	3	4	4	2	1	0	0	0	0	0
591	2	8	0	1	32	3	2	1	2	2	0	0	0	2	0	4	3	4	4	4	4	3	4	3	1	2	2	4	2	1	4	4	4	4	3	3		3	3	4	4	4	2	1	1	0	0	0	1
592	2	8	0	1	32	2	2	0	1	2	0	1	2	2	2	3	4	4		4	4	4	3	4	5	4	4	4	4	4	4	4	4	3	3	4		3	3	5	4	4	2	1	1	0	1	1	1
593	2	8	0	1	34		2		2	0	0	0	2	0	2	4	4	4	4	4	2	2	1	4	3	3	3	3	5	5	3	3	2	3	3	3		3	4	5	4	4	2	1	0	0	0	1	0
594	2	8	0	1	22	4	4	0	0	2	0	0	2	0	0	3	4	4	4	4	3	2	2	2	3	3	4	4	4	4	4	4	4	4	3	2		2	3	3	4	4	1	0	1	0	0	1	0
595	2	3	0	1	51	3	3	0	0	1	0	0	0	0	0	3	3	3	4	4	3	3	3	3	4	3	3	4	4	4	4	4	4	3	3	4		3	4	4	4	3	3	0	1	0	0	0	0
596	2	3	0	1		3	2	1	2	2	0	2	0	0	2	2	3	3	3	4	3	3	3	3	3	3	3	4	3	3	3	3	3	3	3	4		3	4	5	4	4	3	1	1	0	1	0	0
597	2	3	0	0	59	3	2	0	2	0	0	0	0	0	0	3	4	4	1		2	1	3	2	5	1	4	4	2		3	2	3	4	4	4		3	4	4	4	4	3	1	0	0	0	0	0
598	2	3	0			3	2	0	1	1	0	0	2	2	2	4	4	4	3	4	3	3	3	3	3	3	3	4	3	3	4	2	3	3	3	3		2	3	4		4	3	1	1	0	0	1	1
599	2	3	0	1	49	1	2	1	0	0	0	0	2	0	0	3	4	4	3	4	3	3	3	4	4	3	2	3	3	3	2	2	4	4	4	4		4	4	4	4	4	2	0	0	0	0	1	0
600	2	3	0	1	31	1	4	1	0	0	0	0	0	0	0	4	4	4	4	4	3		3	3	4	3	4	4	4	4	4	4	4	4	4	4		4	4		4	4	2	0	0	0	0	0	0
601	2	3	0	1	20	1	4	1	1	1	0	0	2	2	2	3	4	4	4	4	3	4	4	4	4	4	4	4	4	4	4	4	4	4	4	4		4	4	4	4	4	1	1	1	0	0	1	1
602	2	7	1	1	41	1	2	0	0	2	0	1	0	0	0	4	3	3	3	4	3	2	2	1	1	1	1	3	0	0	1	3	3	4	4	4		4	2	3	4	4	2	0	1	0	1	0	0
603	2	7	1	1	38	1	2	0	2	2	0	0	0	0	0	4	4	4	4	4	3		3	4	3	4	4	4	3	1	3	3	2	4	4	4		4	4	4	4	4	2	1	1	0	0	0	0
604	2	7	1	1	54	1	2	0								3	4	4	3	3	3	3	3	4	4	4	4	4	3	4	4	4	4	4	4	4		4	4	4	4	4	3
605	2	7	1	1		2	2	0	1	1	0	2	2	0	2	1	4	4	3	2	3	3	3	3	4	3	3	4	0	3	4	3	4	3	4	4		4	3	3	4	2	3	1	1	0	1	1	0
606	2	7	1	1	55	2	2	0	2	1	0	2	2	0	2	3	1	1	0	1	1	0	0	1	4	1	1	2	1	2	1	2	3	3	3	3		3	3	3	4	4	3	1	1	0	1	1	0
607	2	7	1	1	53	4	2	0	2	0	0	2	0	0	2	4	2	2	1	4	3	3	3	3	3	3	3	3	3	3	3	3	3	3	3	3		3	3	3	4	3	3	1	0	0	1	0	0
608	2	7	1	1	47	3	4	1	2	2	0	0	0	2		3	4	4	4	4	3	4	4	3	3	3	4	4	4	4	4	4	4	3	3	3		3	4	3	4	4	2	1	1	0	0	0	1
609	2	7	1	1	41	3	3	0	2	2	0	0	2	0	0	3	3	3	3	2	2	2	3	3	3	3	3	3	2	3	3	3	3	3	3	3		3	3	3	3	3	2	1	1	0	0	1	0
610	2	7	1	1	32	3	4	0	0	0	0	0	0	0	0	4	4	4	3	4	3	1	2		4	4	4	4	4	3	3	4	4	4	4	4		4	4	4	4	4	2	0	0	0	0	0	0
611	2	7	1	1	59	3	2	1	0	0	0	0	0	0	0	4	4	4	4	4	4	4	4	4	4	4	4	4	4	3	3	3	3	4	4	4		4	4	4	4	4	3	0	0	0	0	0	0
612	2	7	1		41	3	2	0	2	2	0	0	0	0	0	3	3	3	3	3	3	3	4	4	4	4	4	4	3	3	3	3	3	4	4	4		4	4	4	4	4	2	1	1	0	0	0	0
613	2	7	1		57	1	2	1	2	0	0	0	0	0	0	4	3	3	3	3	2	2	2	3	3	3	3	3	2	3	3	3	3	3	3	3		3	3	3	3	3	3	1	0	0	0	0	0
614	2	6	0	1	32	1	3	0	2	0	0	0	2	0	0	4	4	4	4	4	4	4	3	3	3	4	4	4	5	4	5	5	5	4	4	4		4	4	4	4	4	2	1	0	0	0	1	0
615	2	6	0	1	55	1	2	1	0	0	0		2	2	2	4	4	4	4	4	3	2	2	3	1	2	4	3	5	4	4	4	4	4	4	3		3	4	3	3	4	3	0	0	0		1	1
616	2	6	0	1	27	4	4	0	2	2	0	0	0	0	0	3	4	4	4	4	4	4	4	4	4	4	4	4	4	4	4	4	4	4	4	4		4	4	4	4	4	1	1	1	0	0	0	0
617	2	6	0	1	47	3	2	0	2	2	0	0	0	0	0	3	4	4	2	3	3	3	3	3	4	3	3	4	3	3	3	3	2	3	3	3		3	4	4	3	4	2	1	1	0	0	0	0
618	2	6	0	1		2	3	0	1	2	0	2	0	0	0	4	4	4	4	4	3	4	4	4	4	4		4	3	3	3	3	4	3	3	4		4	4	4	4	4	3	1	1	0	1	0	0
619	2	6	0			2	4	1	2	2	0	0	0	2	0	4	4	4	3	4	3	3	3	3	3	3	4	4	3	3	3	3	4	3	3	4		3	3	3	3	3	3	1	1	0	0	0	1
620	2	6	0	1	25	2	4	0	2	2	0	0	0	0	0	4	4	4	4	4	4	3	3	3	4	4	4	4	3	5	4	3	4	4	4	4		4	4	4	4	4	1	1	1	0	0	0	0
621	2	6	0	1	24	1	2	1	2	2	0	0	0	0	0	5	3	3	4	3	3	3	2	3	3	3	3	3	2	2	3	3	4	3	3	3		3	4	4	3	4	1	1	1	0	0	0	0
622	2	6	0	1	23	3	4	0	0	0	0	0	0	0	0	4	3	3	5	5	3	5	5	5	5	5	5	5	5	5	5	5	5	5	5	5		5	5	5	5	5	1	0	0	0	0	0	0
623	2	6	0	0	36	3	3	1	1	2	0	0	2	2	2	4	4	4	4	4	3	3	3	3	3	2	3	4	3	4	4	4	4	4	3	4		3	4	3	4	4	2	1	1	0	0	1	1
624	2	6	0	1	48	3	2	0	2	2	0	2	0	0	0	4	4	4	4	4	4	4	4	4	4	4	4	4	3	3	4	3		4	4	4		4	4	4	4	4	2	1	1	0	1	0	0
625	2	6	0	1	53	3	2	1	0	0	0	0	2	0	2	4	4	4	4	4	3	4	4	4	4	4	4	4	2	3	3	3	3	4	3	4		3	3	4	4	3	3	0	0	0	0	1	0
626	2	6	0	1	48	3	3	0	1	1	0	0	0	0	0	4	4	4	4	4	4	4	4	4	4	4	4	4	3	4	4	4	4	4	4	4		4	4	4	4	4	2	1	1	0	0	0	0
627	2	6	0	1	25	3	4	0	2	1	0	0	1	0	2	4	4	4	5	4	3	4	3	4	4	4	4	4	3	3	3	3	4	4	4	4		4	4	4	4	4	1	1	1	0	0	1	0
628	2	6	0	1	38	3	2	0	0	2	0	0	0	0	0	4	4	4	4	4	4	3	3	4	4	4	4	3	3	4	4	4	4	4	4	4		4	4	4	4	4	2	0	1	0	0	0	0
629	2	3	0	1	32	1	4	0	0	2	0	0	0	0	0	4	4	4	3	3	4	4	3	4	5	3	4	4	3	3	3	3	3	4	4	4		4	4	4	4	4	2	0	1	0	0	0	0
630	2	3	0	0	55	3	2	0	2	2	0	0	0	0	2	3	4	4	3	1	3	1	2	3	3	3	4	4	0	1	2	1	4	4	3	4	4	3	4	4	4	4	3	1	1	0	0	0	0
631	2	3	0	1	23	3	4	0	1	2	0	0	0	0	1	3	4	3	3	4	3	2	3	3	2	2	2	4	3	5	4	4	4	4	4	4	4	3	3	4	4	4	1	1	1	0	0	0	0
632	2	3	0	0	55	3	2	0	2	2	0	0	0	0	2	4	4	4	4	4		3	3	3	5	3	3	4	5	2	4	3	3	4	3	4	3	4	3	4	3	4	3	1	1	0	0	0	0
633	2	3	0	1	34	3		0	1	2	0	0	0	0	0	3	4	4	2	2	3	1	2	4	5	4	4	4	1	3	4	4	4	4	4	4	4	4	4	4	4	4	2	1	1	0	0	0	0
634	2	3	0	1	46	3	2	1	1	1	2	2	2	1	1	4	4	4	3	3	3	5	2	3	3	3	4	4	2	3	3	3	4	4	4	4	4	4	3	5	4	0	2	1	1	1	1	1	1
635	2	3	0	1	47	3	2	1	1	1	0	0	0	1	2	4	3	4	3	4	3	1	1		3	3	4	4	2	3	1	2	3	3	3	4	3	4	3	3	4	4	2	1	1	0	0	0	1
[truncated: 1 more columns]
